# Supplementary material for: Base-promoted deacylation of 2-acetyl-2,5-dihydrothiophenes and their oxygen-mediated hydroxylation
Source: publisher site journal article supplement (doi:10.3762/bjoc.22.13), 2026-01-28

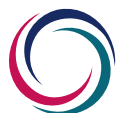

## Supporting Information

for

### Base-promoted deacylation of 2-acetyl-2,5-dihydrothiophenes and their oxygen-mediated hydroxylation

Vladimir G. Ilkin, Margarita Likhacheva, Igor V. Trushkov, Tetyana V. Beryozkina, Vera S. Berseneva, Vladimir T. Abaev, Wim Dehaen and Vasiliy A. Bakulev

*Beilstein J. Org. Chem.* **2026**, 22, 192–204. doi:10.3762/bjoc.22.13

**CheckCIF-file for compound 5g**

# Datablock: exp\_166

|                    |                                                         |                                 |
|--------------------|---------------------------------------------------------|---------------------------------|
| Bond precision:    | C-C = 0.0035 A                                          | Wavelength=0.71073              |
| Cell:              | a=9.3076(5)      b=9.3243(5)      c=10.1072(4)          |                                 |
|                    | alpha=102.086(4)    beta=102.480(4)    gamma=108.253(5) |                                 |
| Temperature:       | 295 K                                                   |                                 |
|                    | Calculated                                              | Reported                        |
| Volume             | 776.19(8)                                               | 776.19(7)                       |
| Space group        | P -1                                                    | P -1                            |
| Hall group         | -P 1                                                    | -P 1                            |
| Moiety formula     | C17 H18 N2 O2 S                                         | C17 H18 N2 O2 S                 |
| Sum formula        | C17 H18 N2 O2 S                                         | C17 H18 N2 O2 S                 |
| Mr                 | 314.39                                                  | 314.39                          |
| Dx,g cm-3          | 1.345                                                   | 1.345                           |
| Z                  | 2                                                       | 2                               |
| Mu (mm-1)          | 0.217                                                   | 0.217                           |
| F000               | 332.0                                                   | 332.0                           |
| F000'              | 332.38                                                  |                                 |
| h,k,lmax           | 13,13,14                                                | 12,13,14                        |
| Nref               | 4745                                                    | 4252                            |
| Tmin,Tmax          | 0.906,0.953                                             | 0.711,1.000                     |
| Tmin'              | 0.899                                                   |                                 |
| Correction method= | # Reported T Limits: Tmin=0.711 Tmax=1.000              |                                 |
| AbsCorr =          | MULTI-SCAN                                              |                                 |
| Data completeness= | 0.896                                                   | Theta(max)= 30.500              |
| R(reflections)=    | 0.0596( 2973)                                           | wR2(reflections)= 0.1768( 4252) |
| S =                | 1.060                                                   | Npar= 208                       |

The following ALERTS were generated. Each ALERT has the format  
[test-name\\_ALERT\\_alert-type\\_alert-level](#).  
Click on the hyperlinks for more details of the test.

## Alert level G

|                                   |                                                  |                                        |              |
|-----------------------------------|--------------------------------------------------|----------------------------------------|--------------|
| <a href="#">PLAT012_ALERT_1_G</a> | No                                               | _shelx_res_checksum Found in CIF ..... | Please Check |
| <a href="#">PLAT398_ALERT_2_G</a> | Deviating                                        | C-O-C Angle From 120 for O1            | 110.0 Degree |
| <a href="#">PLAT793_ALERT_4_G</a> | Model has Chirality at C4                        | (Centro SpGr)                          | R Verify     |
| <a href="#">PLAT793_ALERT_4_G</a> | Model has Chirality at C5                        | (Centro SpGr)                          | R Verify     |
| <a href="#">PLAT933_ALERT_2_G</a> | Number of HKL-OMIT Records in Embedded .res File |                                        | 4 Note       |
|                                   | -3 5 11, 1 11 0, -4-10 6, 4 -3 1,                |                                        |              |

- 0

ALERT level A

= Most likely a serious problem - resolve or explain
- 0

ALERT level B

= A potentially serious problem, consider carefully
- 0

ALERT level C

= Check. Ensure it is not caused by an omission or oversight
- 5

ALERT level G

= General information/check it is not something unexpected
- 1

ALERT type 1

CIF construction/syntax error, inconsistent or missing data
- 2

ALERT type 2

Indicator that the structure model may be wrong or deficient
- 0

ALERT type 3

Indicator that the structure quality may be low
- 2

ALERT type 4

Improvement, methodology, query or suggestion
- 0

ALERT type 5

Informative message, check

It is advisable to attempt to resolve as many as possible of the alerts in all categories. Often the minor alerts point to easily fixed oversights, errors and omissions in your CIF or refinement strategy, so attention to these fine details can be worthwhile. It is up to the individual to critically assess their own results and, if necessary, seek expert advice.

PLATON-NOV 22 13:28:43 2025 - (VERSION=260925)

exp\_166

P -1

$$R = 0.06$$

RES= 0 88 X

NOMOVE FORCED

Prob = 50%  
Temp = 295K

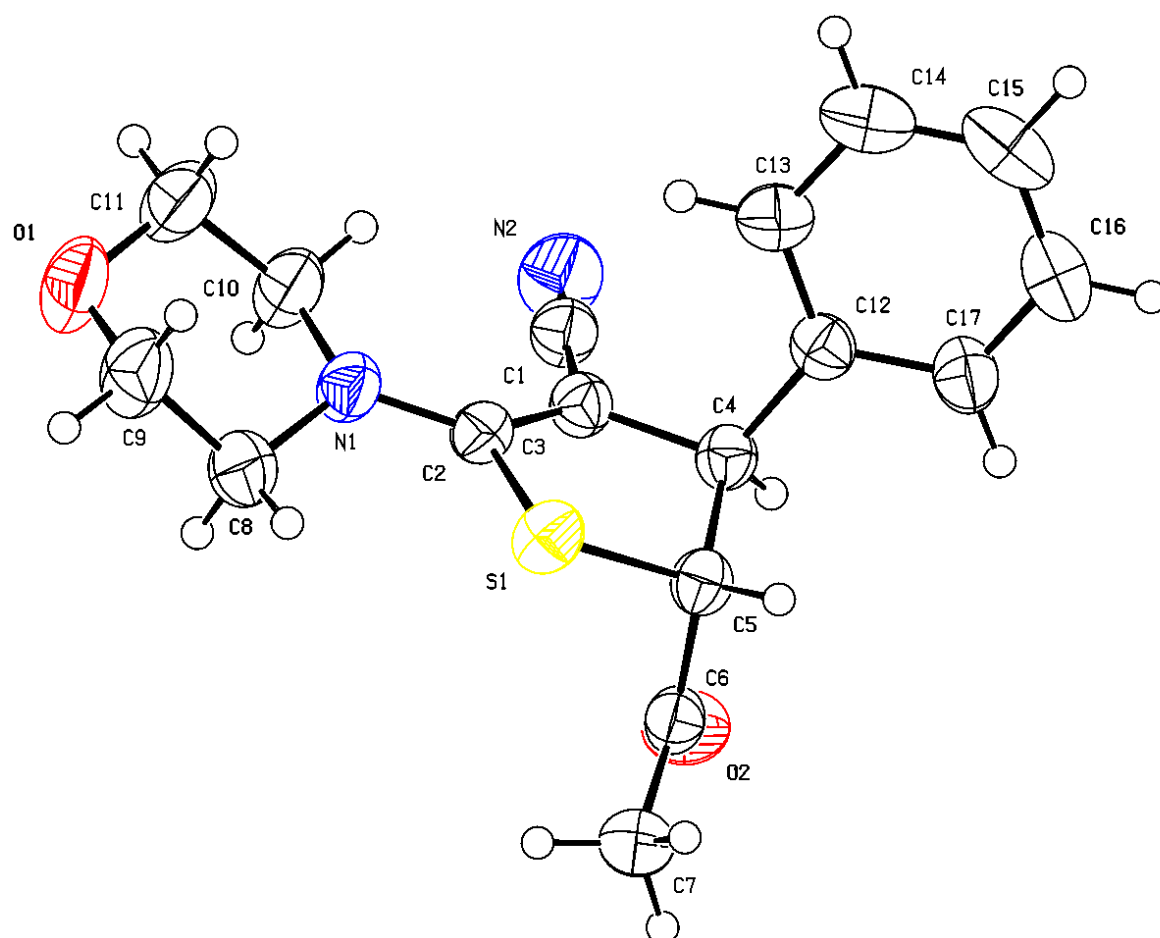

Supplement: Additional file 4 [file 1860-5397-22-13-S4.pdf]
