# Supplementary material for: Base-promoted deacylation of 2-acetyl-2,5-dihydrothiophenes and their oxygen-mediated hydroxylation
Source: publisher site journal article supplement (doi:10.3762/bjoc.22.13), 2026-01-28
Supplement: Additional file 1 [file 1860-5397-22-13-S1.pdf]

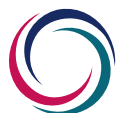

## Supporting Information

for

### Base-promoted deacylation of 2-acetyl-2,5-dihydrothiophenes and their oxygen-mediated hydroxylation

Vladimir G. Ilkin, Margarita Likhacheva, Igor V. Trushkov, Tetyana V. Beryozkina, Vera S. Berseneva, Vladimir T. Abaev, Wim Dehaen and Vasiliy A. Bakulev

*Beilstein J. Org. Chem.* **2026**, 22, 192–204. doi:10.3762/bjoc.22.13

### Full experimental details and characterization data of all new compounds

## Table of contents

|                                                                                              |     |
|----------------------------------------------------------------------------------------------|-----|
| Experimental                                                                                 | S3  |
| Dihydrothiophenes were used in the research                                                  | S3  |
| Preparation of starting reagent                                                              | S4  |
| Optimization study                                                                           | S9  |
| General procedure for derivatization of dihydrothiophenes <b>1</b> in ethanolic solution     | S10 |
| General procedure for deacetylation of dihydrothiophenes <b>1</b> in methanolic solution     | S15 |
| General procedure for derivatization of dihydrothiophenes <b>4a–f</b> in ethanolic solution. |     |
| Method A                                                                                     | S19 |
| Method B (one-pot)                                                                           | S19 |
| The procedure for the derivatization of dihydrothiophene <b>4g</b>                           | S21 |
| Additional mechanistic studies                                                               | S22 |
| References                                                                                   | S24 |

## Experimental

General. All chemicals were obtained from commercial sources and were used without further purification. Dry solvents (chloroform and alcohols) were obtained according to the literature protocols and stored over molecular sieves. Analytical thin-layer chromatography was performed on aluminum foil plates coated with 0.2 mm of silica gel. Column chromatography was performed by using 230–400 mesh silica gel. Melting points were determined on a Stuart SMP10 melting point apparatus and were uncorrected. All NMR spectra were recorded at 400 or 600 ( $^1\text{H}$  NMR) and 100 or 150 MHz ( $^{13}\text{C}$  NMR) in  $\text{CDCl}_3$  or  $\text{DMSO}-d_6$ . The chemical shifts are given in parts per million (ppm) relative to the resonance of the solvents [ $^1\text{H}$ :  $\delta$  ( $\text{CDCl}_3$ ) = 7.26,  $\delta$  ( $\text{DMSO}-d_6$ ) = 2.50,  $^{13}\text{C}$ :  $\delta$  ( $\text{CDCl}_3$ ) = 77.2,  $\delta$  ( $\text{DMSO}-d_6$ ) = 39.5 ppm]. Multiplicities were given as s (singlet), d (doublet), t (triplet) and m (multiplet). Coupling constants are reported as the  $J$  value in Hertz (Hz). High-resolution mass spectra (HRMS) were recorded using an ultrahigh-resolution quadrupole time-of-flight mass spectrometer with an electrospray ionization probe installed coupled with an Agilent 1260 HPLC system.

## Dihydrothiophenes were used in the research

Dihydrothiophenes were obtained in the Cu(I)-catalyzed reaction

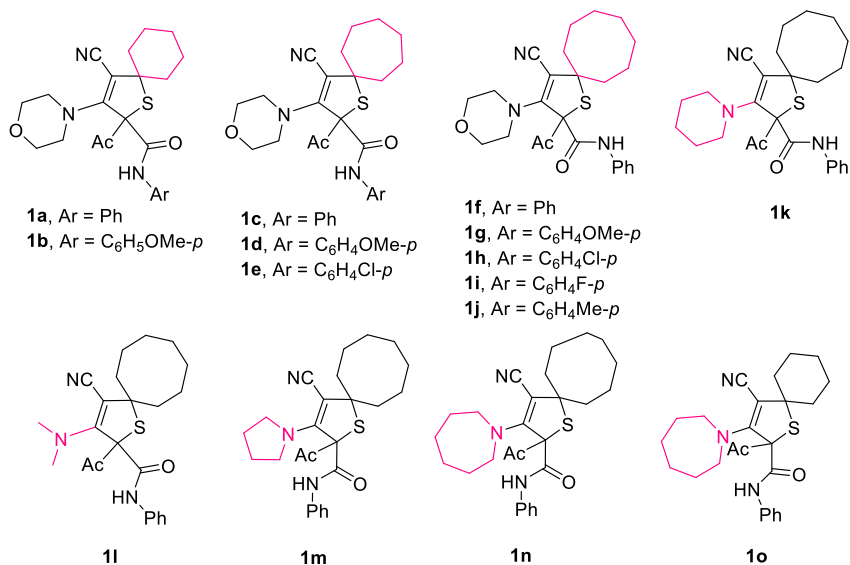

Dihydrothiophenes were obtained in the Rh(II)-catalyzed reaction

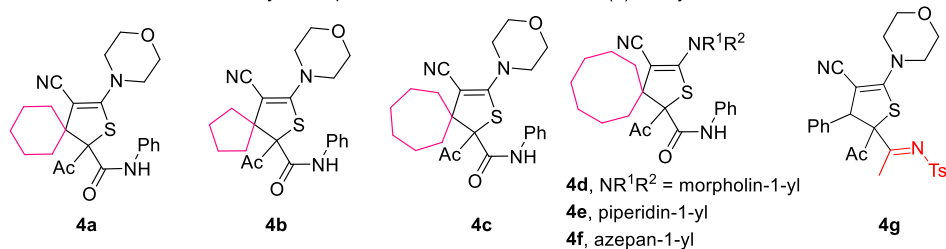

## Preparation of starting reagent

Dihydrothiophenes **1** and **4** were synthesized according to the previous reported procedure [1]. Dihydrothiophenes **1a,c,f,4a–g** were characterized previously [1]. Diazo compounds were synthesized according to the previous reported procedure [2] (2-diazo-3-oxo-*N*-phenylbutanamide, 2-diazo-*N*-(4-fluorophenyl)-3-oxobutanamide, 2-diazo-3-oxo-*N*-(*p*-tolyl)butanamide) or with the use of the another procedure [3] (2-diazo-*N*-(4-methoxyphenyl)-3-oxobutanamide, *N*-(4-chlorophenyl)-2-diazo-3-oxobutanamide).

*2-Acetyl-4-cyano-N-(4-methoxyphenyl)-3-morpholino-1-thiaspiro[4.5]dec-3-ene-2-carboxamide (1b)*. Product **1b** was obtained from 2-cyclohexylidene-3-morpholino-3-thioxopropanenitrile (200 mg, 1.0 equiv, 0.80 mmol), 2-diazo-*N*-(4-methoxyphenyl)-3-oxobutanamide (373 mg, 2.0 equiv, 1.60 mmol), [Cu(MeCN)<sub>4</sub>]OTf (60 mg, 10 mol %), chloroform (6.0 mL), 90 °C, reaction time is 24 h. The purification of the crude product by column chromatography on SiO<sub>2</sub> (DCM/EtOAc, gradient 25:0 to 23.5:1.5) afforded **1b** as a yellow oily mass. The latter was triturated and centrifugated at first with hexane/diethyl ether (1:1) and then with hexane (2 mL), affording **1b** as a beige powder (53%, 195 mg), mp 184–186 °C. <sup>1</sup>H NMR (400 MHz, CDCl<sub>3</sub>-*d*): δ 9.20 (s, 1H), 7.44 (d, *J* = 9.0 Hz, 2H), 6.89 (d, *J* = 9.0 Hz, 2H), 3.80 (s, 3H), 3.69 – 3.61 (m, 4H), 3.57 – 3.50 (m, 2H), 3.37 – 3.31 (m, 2H), 2.47 (s, 3H), 2.04 – 1.94 (m, 3H), 1.87 – 1.78 (m, 3H), 1.68 – 1.61 (m, 1H), 1.47 – 1.13 (m, 3H). <sup>13</sup>C{<sup>1</sup>H} NMR (100 MHz, CDCl<sub>3</sub>-*d*): δ 201.7, 165.7, 157.1, 156.0, 130.3, 121.9, 117.7, 114.5, 93.8, 71.1, 66.5, 63.6, 55.7, 50.4, 40.1, 38.9, 26.6, 24.5, 24.4, 23.8. HRMS (ESI) *m/z*: [M + H]<sup>+</sup> Calcd for C<sub>24</sub>H<sub>30</sub>N<sub>3</sub>O<sub>4</sub>S<sup>+</sup> 456.1951; Found 456.1958.

*2-Acetyl-4-cyano-N-(4-methoxyphenyl)-3-morpholino-1-thiaspiro[4.6]undec-3-ene-2-carboxamide (1d)*. Product **1d** was obtained from 2-cycloheptylidene-3-morpholino-3-thioxopropanenitrile (200 mg, 1.0 equiv, 0.76 mmol), 2-diazo-*N*-(4-methoxyphenyl)-3-oxobutanamide (353 mg, 2.0 equiv, 1.52 mmol), [Cu(MeCN)<sub>4</sub>]OTf (57 mg, 10 mol %), chloroform (6.0 mL), 90 °C, reaction time is 24 h. The purification of the crude product by column chromatography on SiO<sub>2</sub> (DCM/EtOAc, gradient 25:0 to 23.5:1.5) afforded **1d** as a yellow oily mass. The latter was triturated and centrifugated at first with hexane/diethyl ether (1:1) and then with hexane (2 mL), affording **1d** as a beige powder (52%, 184 mg), mp 148–150 °C. <sup>1</sup>H NMR (400 MHz, CDCl<sub>3</sub>-*d*): δ 9.15 (s, 1H), 7.43 (d, *J* = 9.0 Hz, 2H), 6.89 (d, *J* = 9.0 Hz, 2H), 3.80 (s, 3H), 3.69 – 3.59 (m, 4H), 3.56 – 3.50 (m, 2H), 3.34 – 3.29 (m, 2H), 2.47 (s, 3H), 2.28 – 2.16 (m, 3H), 2.04 – 1.98 (m, 1H), 1.81 – 1.77 (m, 2H), 1.62 – 1.50 (m, 6H). <sup>13</sup>C{<sup>1</sup>H} NMR (100 MHz, CDCl<sub>3</sub>-*d*): δ 201.6, 165.6, 157.1, 155.6,

130.3, 121.9, 117.9, 114.5, 95.3, 71.6, 66.6, 65.8, 55.7, 50.4, 44.2, 42.6, 27.7, 26.7, 24.6, 24.0. HRMS (ESI)  $m/z$ :  $[M + H]^+$  Calcd for  $C_{25}H_{32}N_3O_4S^+$  470.2111; Found 470.2115.

*2-Acetyl-N-(4-chlorophenyl)-4-cyano-3-morpholino-1-thiaspiro[4.6]undec-3-ene-2-carboxamide (1e)*. Product **1e** was obtained from 2-cycloheptylidene-3-morpholino-3-thioxopropanenitrile (200 mg, 1.0 equiv, 0.76 mmol), *N*-(4-chlorophenyl)-2-diazo-3-oxobutanamide (359 mg, 2.0 equiv, 1.52 mmol),  $[Cu(MeCN)_4]OTf$  (57 mg, 10 mol %), chloroform (6.0 mL), 90 °C, reaction time is 24 h. The purification of the crude product by column chromatography on  $SiO_2$  (DCM/EtOAc, gradient 25:0 to 25:1.0) afforded **1e** as a yellow oily mass. The latter was triturated and centrifugated with hexane/diethyl ether (1:1) and then with hexane (2 mL) affording **1e** as a beige powder (56%, 200 mg), mp 180–182 °C.  $^1H$  NMR (400 MHz,  $CDCl_3-d$ ):  $\delta$  9.41 (s, 1H), 7.49 (d,  $J$  = 8.8 Hz, 2H), 7.32 (d,  $J$  = 8.8 Hz, 2H), 3.69 – 3.60 (m, 4H), 3.52 – 3.47 (m, 2H), 3.34 – 3.28 (m, 2H), 2.48 (s, 3H), 2.26 – 2.19 (m, 3H), 2.06 – 2.00 (m, 1H), 1.83 – 1.76 (m, 2H), 1.64 – 1.48 (m, 6H).  $^{13}C\{^1H\}$  NMR (100 MHz,  $CDCl_3-d$ ):  $\delta$  201.8, 166.0, 155.0, 135.8, 130.3, 129.3, 121.5, 117.8, 95.4, 71.0, 66.5, 66.3, 50.2, 44.2, 42.7, 27.7, 27.7, 26.5, 24.5, 24.1. HRMS (ESI)  $m/z$ :  $[M + H]^+$  Calcd for  $C_{24}H_{29}ClN_3O_3S^+$  474.1613; Found 474.1621.

*2-Acetyl-4-cyano-N-(4-methoxyphenyl)-3-morpholino-1-thiaspiro[4.7]dodec-3-ene-2-carboxamide (1g)*. Product **1g** was obtained from 2-cyclooctylidene-3-morpholino-3-thioxopropanenitrile (300 mg, 1.0 equiv, 1.08 mmol), 2-diazo-*N*-(4-methoxyphenyl)-3-oxobutanamide (503 mg, 2.0 equiv, 2.16 mmol),  $[Cu(MeCN)_4]OTf$  (81 mg, 10 mol %), chloroform (7.0 mL), 90 °C, reaction time is 24 h. The purification of the crude product by column chromatography on  $SiO_2$  (DCM/EtOAc, gradient 25:0 to 25:1.2) afforded **1g** as a yellow oily mass. The latter was triturated with hexane/diethyl ether (3:1) until dissolving. After the evaporation of solvents in the hood, the precipitate was formed. It was triturated with hexane (3 mL) and centrifugated, then the procedure was repeated in hexane/diethyl ether (3:0.5) and (3:1) affording **1g** as a colorless powder (58%, 304 mg), mp 155–157 °C.  $^1H$  NMR (400 MHz,  $CDCl_3-d$ ):  $\delta$  9.16 (s, 1H), 7.43 (d,  $J$  = 9.0 Hz, 2H), 6.89 (d,  $J$  = 9.1 Hz, 2H), 3.80 (s, 3H), 3.69 – 3.60 (m, 4H), 3.57 – 3.51 (m, 2H), 3.35 – 3.30 (m, 2H), 2.46 (s, 3H), 2.41 – 2.29 (m, 2H), 2.24 – 2.18 (m, 1H), 2.07 – 2.00 (m, 1H), 1.90 – 1.84 (m, 2H), 1.63 – 1.49 (m, 8H).  $^{13}C\{^1H\}$  NMR (100 MHz,  $CDCl_3-d$ ):  $\delta$  201.5, 165.6, 157.1, 156.2, 130.3, 121.9, 118.2, 114.5, 94.5, 71.4, 66.6, 65.6, 55.7, 50.5, 40.8, 38.7, 27.9, 27.8, 26.6, 24.5, 24.1, 23.9. HRMS (ESI)  $m/z$ :  $[M + H]^+$  Calcd for  $C_{26}H_{34}N_3O_4S^+$  484.2264; Found 484.2270.

*2-Acetyl-N-(4-chlorophenyl)-4-cyano-3-morpholino-1-thiaspiro[4.7]dodec-3-ene-2-carboxamide (1h)*. Product **1h** was obtained from 2-cyclooctylidene-3-morpholino-3-thioxopropanenitrile (200 mg, 1.0 equiv, 0.72 mmol), *N*-(4-chlorophenyl)-2-diazo-3-oxobutanamide (342 mg, 2.0 equiv, 1.44 mmol), [Cu(MeCN)<sub>4</sub>]OTf (47 mg, 10 mol %), chloroform (6.0 mL), 90 °C, reaction time is 24 h. The purification of the crude product by column chromatography on SiO<sub>2</sub> (DCM/EtOAc, gradient 25:0 to 25:1.0) afforded **1h** as a yellow oily mass. The latter was triturated with hexane/diethyl ether (1:1) and centrifugated, affording **1h** as a beige powder (44%, 156 mg), mp 177–179 °C. <sup>1</sup>H NMR (400 MHz, CDCl<sub>3</sub>-d): δ 9.42 (s, 1H), 7.49 (d, *J* = 8.8 Hz, 2H), 7.32 (d, *J* = 8.8 Hz, 2H), 3.69 – 3.60 (m, 4H), 3.53 – 3.46 (m, 2H), 3.35 – 3.29 (m, 2H), 2.47 (s, 3H), 2.39 – 2.32 (m, 2H), 2.25 – 2.19 (m, 1H), 2.09 – 2.02 (m, 1H), 1.90 – 1.83 (m, 2H), 1.65 – 1.50 (m, 8H). <sup>13</sup>C{<sup>1</sup>H} NMR (100 MHz, CDCl<sub>3</sub>-d): δ 201.7, 166.0, 155.7, 135.8, 130.3, 129.3, 121.5, 118.1, 94.6, 70.9, 66.5, 66.1, 50.4, 40.8, 38.9, 27.9, 27.7, 26.5, 24.4, 24.1, 24.0. HRMS (ESI) *m/z*: [M + H]<sup>+</sup> Calcd for C<sub>25</sub>H<sub>31</sub>ClN<sub>3</sub>O<sub>3</sub>S<sup>+</sup> 488.1769; Found 488.1774.

*2-Acetyl-4-cyano-N-(4-fluorophenyl)-3-morpholino-1-thiaspiro[4.7]dodec-3-ene-2-carboxamide (1i)*. Product **1i** was obtained from 2-cyclooctylidene-3-morpholino-3-thioxopropanenitrile (200 mg, 1.0 equiv, 0.72 mmol), 2-diazo-*N*-(4-fluorophenyl)-3-oxobutanamide (318 mg, 2.0 equiv, 1.44 mmol), [Cu(MeCN)<sub>4</sub>]OTf (54 mg, 10 mol %), chloroform (6.0 mL), 90 °C, reaction time is 24 h. The purification of the crude product by column chromatography on SiO<sub>2</sub> (DCM/EtOAc, gradient 25:0 to 23.4:1.6), affording **1i** as a yellow oily mass. The latter was triturated with hexane/diethyl ether (2:1) and centrifugated afforded **1i** as a beige powder (64%, 218 mg), mp 178–180 °C. <sup>1</sup>H NMR (400 MHz, CDCl<sub>3</sub>-d): δ 9.35 (s, 1H), 7.51 – 7.48 (m, 2H), 7.07 – 7.03 (m, 2H), 3.70 – 3.61 (m, 4H), 3.54 – 3.49 (m, 2H), 3.35 – 3.30 (m, 2H), 2.47 (s, 3H), 2.40 – 2.32 (m, 2H), 2.25 – 2.19 (m, 1H), 2.08 – 2.02 (m, 1H), 1.91 – 1.84 (m, 2H), 1.62 – 1.50 (m, 8H). <sup>13</sup>C{<sup>1</sup>H} NMR (100 MHz, CDCl<sub>3</sub>-d): δ 201.7, 165.9, 159.9 (d, *J* = 244.9 Hz), 155.8, 133.3 (d, *J* = 2.9 Hz), 122.0 (d, *J* = 8.0 Hz), 118.1, 116.0 (d, *J* = 22.6 Hz), 94.6, 71.0, 66.5, 66.0, 50.4, 40.8, 38.9, 27.9, 27.8, 26.5, 24.4, 24.1, 24.0. HRMS (ESI) *m/z*: [M + H]<sup>+</sup> Calcd for C<sub>25</sub>H<sub>31</sub>FN<sub>3</sub>O<sub>3</sub>S<sup>+</sup> 472.2065; Found 472.2072.

*2-Acetyl-4-cyano-3-morpholino-N-(p-tolyl)-1-thiaspiro[4.7]dodec-3-ene-2-carboxamide (1j)*. Product **1j** was obtained from 2-cyclooctylidene-3-morpholino-3-thioxopropanenitrile (180 mg, 1.0 equiv, 0.65 mmol), 2-diazo-3-oxo-*N*-(*p*-tolyl)butanamide (282 mg, 2.0 equiv, 1.30 mmol), [Cu(MeCN)<sub>4</sub>]OTf (48 mg, 10 mol %), chloroform (6.0 mL), 90 °C, reaction time is 24 h. The purification of the crude product by column chromatography on SiO<sub>2</sub>

(DCM/EtOAc, gradient 25:0 to 24.6:0.4), affording **1j** as a yellow oily mass. The latter was triturated with hexane/diethyl ether (1:1) until dissolution. After the evaporation of solvents in the hood, a precipitate was formed. This was triturated with hexane and centrifugated (3x2 mL), affording **1j** as a colorless powder (59%, 179 mg), mp 185–187 °C. <sup>1</sup>H NMR (400 MHz, CDCl<sub>3</sub>-d): δ 9.19 (s, 1H), 7.40 (d, *J* = 8.4 Hz, 2H), 7.16 (d, *J* = 8.2 Hz, 2H), 3.69 – 3.59 (m, 4H), 3.56 – 3.51 (m, 2H), 3.35 – 3.29 (m, 2H), 2.46 (s, 3H), 2.40 – 2.30 (m, 2H+3H), 2.25 – 2.18 (m, 1H), 2.06 – 2.00 (m, 1H), 1.92 – 1.84 (m, 2H), 1.63 – 1.51 (m, 8H). <sup>13</sup>C{<sup>1</sup>H} NMR (100 MHz, CDCl<sub>3</sub>-d): δ 201.5, 165.7, 156.2, 135.0, 134.6, 129.8, 120.2, 118.2, 94.5, 71.5, 66.6, 65.6, 50.5, 40.8, 38.7, 27.9, 27.8, 26.6, 24.5, 24.1, 23.9, 21.0. HRMS (ESI) *m/z*: [M + H]<sup>+</sup> Calcd for C<sub>26</sub>H<sub>34</sub>N<sub>3</sub>O<sub>3</sub>S<sup>+</sup> 468.2315; Found 468.2322.

*2-Acetyl-4-cyano-N-phenyl-3-(piperidin-1-yl)-1-thiaspiro[4.7]dodec-3-ene-2-carboxamide (1k)*. Product **1k** was obtained from 2-cyclooctylidene-3-(piperidin-1-yl)-3-thioxopropanenitrile (300 mg, 1.0 equiv, 1.09 mmol), 2-diazo-3-oxo-*N*-phenylbutanamide (443 mg, 2.0 equiv, 2.18 mmol), [Cu(MeCN)<sub>4</sub>]OTf (82 mg, 10 mol %), chloroform (6.0 mL), 90 °C, reaction time is 24 h. The purification of the crude product by column chromatography on SiO<sub>2</sub> (PE/EtOAc, gradient 25:0 to 32:18), affording **1k** as a yellow oily mass. The latter was triturated with hexane/diethyl ether (1:1) and centrifugated, affording **1k** as a colorless powder (54%, 250 mg), mp 180–182 °C. <sup>1</sup>H NMR (400 MHz, CDCl<sub>3</sub>-d): δ 9.57 (s, 1H), 7.55 (d, *J* = 7.7 Hz, 2H), 7.34 (t, *J* = 7.9 Hz, 2H), 7.14 (t, *J* = 7.4 Hz, 1H), 3.42 – 3.39 (m, 2H), 3.34 – 3.29 (m, 2H), 2.47 (s, 3H), 2.41 – 2.34 (m, 2H), 2.29 – 2.23 (m, 1H), 2.10 – 2.04 (m, 1H), 1.90 – 1.81 (m, 2H), 1.66 – 1.49 (m, 14H). <sup>13</sup>C{<sup>1</sup>H} NMR (100 MHz, CDCl<sub>3</sub>-d): δ 202.3, 166.1, 156.1, 137.6, 129.2, 124.9, 120.3, 118.9, 92.1, 70.3, 66.1, 51.4, 40.8, 39.2, 28.0, 27.8, 26.4, 25.9, 24.4, 24.2, 24.2, 23.6. HRMS (ESI) *m/z*: [M + H]<sup>+</sup> Calcd for C<sub>26</sub>H<sub>34</sub>N<sub>3</sub>O<sub>2</sub>S<sup>+</sup> 452.2366; Found 452.2371.

*2-Acetyl-4-cyano-3-(dimethylamino)-N-phenyl-1-thiaspiro[4.7]dodec-3-ene-2-carboxamide (1l)*. Product **1l** was obtained from 2-cyano-2-cyclooctylidene-*N,N*-dimethylethanethioamide (133 mg, 1.0 equiv, 0.56 mmol), 2-diazo-3-oxo-*N*-phenylbutanamide (229 mg, 2.0 equiv, 1.12 mmol), [Cu(MeCN)<sub>4</sub>]OTf (42 mg, 10 mol %), chloroform (6.0 mL), 85 °C, reaction time is 24 h. The purification of the crude product by column chromatography on SiO<sub>2</sub> (PE/EtOAc, gradient 25:0 to 25:25) afforded **1l** as a yellow oily mass. The latter was triturated with hexane/diethyl ether (1:1) and centrifugated; then the procedure was repeated in hexane (2 mL), affording **1l** as a colorless powder (41%, 94 mg), mp 185–187 °C. <sup>1</sup>H NMR (400 MHz, CDCl<sub>3</sub>-d): δ 9.77 (s, 1H), 7.56 (d, *J* = 8.6 Hz, 2H), 7.34 (t, *J* = 7.9 Hz, 2H), 7.13 (t, *J* = 7.4 Hz, 1H), 3.06 (s,

6H), 2.48 (s, 3H), 2.47 – 2.25 (m, 3H), 2.16 – 2.08 (m, 1H), 1.91 – 1.84 (m, 2H), 1.66 – 1.47 (m, 8H).  $^{13}\text{C}\{^1\text{H}\}$  NMR (100 MHz,  $\text{CDCl}_3$ -d):  $\delta$  202.4, 166.1, 155.8, 137.6, 129.2, 125.0, 120.4, 119.3, 91.7, 69.6, 66.7, 42.9, 41.1, 39.4, 28.1, 27.7, 26.0, 24.2, 24.1. HRMS (ESI)  $m/z$ :  $[\text{M} + \text{H}]^+$  Calcd for  $\text{C}_{23}\text{H}_{30}\text{N}_3\text{O}_2\text{S}^+$  412.2053; Found 412.2057.

*2-Acetyl-4-cyano-N-phenyl-3-(pyrrolidin-1-yl)-1-thiaspiro[4.7]dodec-3-ene-2-carboxamide (1m)*. Product **1m** was obtained from 2-cyclooctylidene-3-(pyrrolidin-1-yl)-3-thioxopropanenitrile (300 mg, 1.0 equiv, 1.14 mmol), 2-diazo-3-oxo-*N*-phenylbutanamide (463 mg, 2.0 equiv, 2.28 mmol),  $[\text{Cu}(\text{MeCN})_4]\text{OTf}$  (86 mg, 10 mol %), chloroform (6.0 mL), 90 °C, reaction time is 24 h. The purification of the crude product by column chromatography on  $\text{SiO}_2$  (DCM) afforded **1m** as a yellow oily mass. The latter was triturated with hexane/diethyl ether (1:1) and centrifugated, affording **1m** as a colorless powder (55%, 269 mg), mp 136–138 °C.  $^1\text{H}$  NMR (400 MHz,  $\text{CDCl}_3$ -d):  $\delta$  9.84 (s, 1H), 7.56 (d,  $J = 7.6$  Hz, 2H), 7.34 (t,  $J = 7.9$  Hz, 2H), 7.13 (t,  $J = 7.4$  Hz, 1H), 3.59 – 3.53 (m, 2H), 3.47 – 3.42 (m, 2H), 2.50 (s, 3H), 2.47 – 2.36 (m, 2H), 2.34 – 2.27 (m, 1H), 2.17 – 2.11 (m, 1H), 1.92 – 1.83 (m, 6H), 1.66 – 1.52 (m, 8H).  $^{13}\text{C}\{^1\text{H}\}$  NMR (100 MHz,  $\text{CDCl}_3$ -d):  $\delta$  202.5, 166.1, 153.4, 137.7, 129.2, 124.9, 120.3, 119.9, 89.8, 69.7, 67.1, 50.8, 41.3, 39.6, 28.2, 27.7, 26.0, 25.6, 24.3, 24.3, 24.2. HRMS (ESI)  $m/z$ :  $[\text{M} + \text{H}]^+$  Calcd for  $\text{C}_{25}\text{H}_{32}\text{N}_3\text{O}_2\text{S}^+$  438.2210; Found 438.2215.

*2-Acetyl-3-(azepan-1-yl)-4-cyano-N-phenyl-1-thiaspiro[4.7]dodec-3-ene-2-carboxamide (1n)*. Product **1n** was obtained from 3-(azepan-1-yl)-2-cyclooctylidene-3-thioxopropanenitrile (300 mg, 1.0 equiv, 1.03 mmol), 2-diazo-3-oxo-*N*-phenylbutanamide (419 mg, 2.0 equiv, 2.06 mmol),  $[\text{Cu}(\text{MeCN})_4]\text{OTf}$  (78 mg, 10 mol %), chloroform (6.0 mL), 90 °C, reaction time is 24 h. The purification of the crude product by column chromatography on  $\text{SiO}_2$  (DCM/PE, gradient 0:25 to 10:40), affording **1n** as a yellow oily mass. The latter was triturated with hexane/diethyl ether (1:1) and centrifugated, affording **1n** as a colorless powder (54%, 261 mg), mp 124–126 °C.  $^1\text{H}$  NMR (400 MHz,  $\text{CDCl}_3$ -d):  $\delta$  9.93 (s, 1H), 7.56 (d,  $J = 7.7$  Hz, 2H), 7.33 (t,  $J = 7.9$  Hz, 2H), 7.13 (t,  $J = 7.4$  Hz, 1H), 3.50 – 3.38 (m, 4H), 2.50 (s, 3H), 2.48 – 2.28 (m, 3H), 2.15 – 2.09 (m, 1H), 1.91 – 1.79 (m, 6H), 1.62 – 1.51 (m, 12H).  $^{13}\text{C}\{^1\text{H}\}$  NMR (100 MHz,  $\text{CDCl}_3$ -d):  $\delta$  202.4, 166.2, 155.0, 137.7, 129.2, 124.8, 120.4, 89.2, 69.6, 66.8, 52.9, 41.1, 39.7, 29.0, 28.2, 27.7, 27.1, 26.0, 24.2, 24.1. HRMS (ESI)  $m/z$ :  $[\text{M} + \text{H}]^+$  Calcd for  $\text{C}_{27}\text{H}_{36}\text{N}_3\text{O}_2\text{S}^+$  466.2523; Found 466.2530.

*2-Acetyl-3-(azepan-1-yl)-4-cyano-N-phenyl-1-thiaspiro[4.5]dec-3-ene-2-carboxamide (1o)*. Product **1o** was obtained from 3-(azepan-1-yl)-2-cyclohexylidene-3-



thioxopropanenitrile (186 mg, 1.0 equiv, 0.71 mmol), 2-diazo-3-oxo-*N*-phenylbutanamide (288 mg, 2.0 equiv, 1.42 mmol), [Cu(MeCN)<sub>4</sub>]OTf (53 mg, 10 mol %), chloroform (6.0 mL), 90 °C, reaction time is 24 h. The purification of the crude product by column chromatography on SiO<sub>2</sub> (DCM/PE, gradient 0:25 to 40:10), affording **1o** as a yellow oily mass. The latter was additionally purified on neutral Al<sub>2</sub>O<sub>3</sub> (EtOAc/PE, gradient 0:25 to 5:45) afforded **1o** as pale-yellow oil (54%, 167 mg). <sup>1</sup>H NMR (400 MHz, CDCl<sub>3</sub>-*d*): δ 9.96 (s, 1H), 7.57 (d, *J* = 7.6 Hz, 2H), 7.34 (t, *J* = 7.9 Hz, 2H), 7.13 (t, *J* = 7.4 Hz, 1H), 3.51 – 3.38 (m, 4H), 2.51 (s, 3H), 2.17 – 2.09 (m, 2H), 2.01 – 1.93 (m, 2H), 1.82 – 1.73 (m, 6H), 1.66 – 1.61 (m, 5H), 1.47 – 1.39 (m, 1H), 1.36 – 1.27 (m, 1H), 1.22 – 1.14 (m, 1H). <sup>13</sup>C{<sup>1</sup>H} NMR (100 MHz, CDCl<sub>3</sub>-*d*): δ 202.5, 166.1, 154.7, 137.7, 129.2, 124.8, 120.3, 119.2, 88.4, 69.4, 64.7, 52.7, 40.1, 39.8, 29.0, 27.1, 26.0, 24.5, 24.1. HRMS (ESI) *m/z*: [M + H]<sup>+</sup> Calcd for C<sub>25</sub>H<sub>32</sub>N<sub>3</sub>O<sub>2</sub>S<sup>+</sup> 438.2209; Found 438.2213.

## Optimization study

**Table 1:** Optimization of the transformation of dihydrothiophene **1a**.

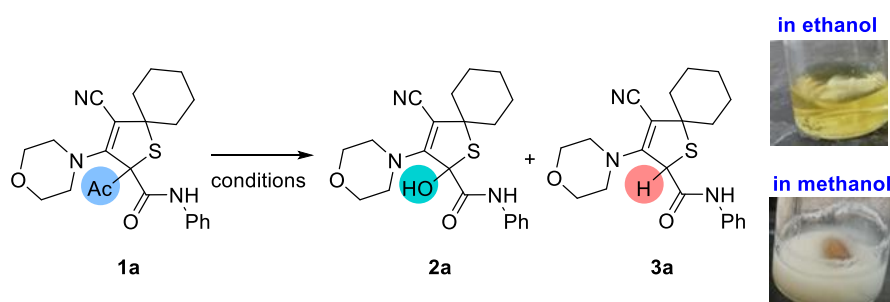

| Entry | [M] or Base<br>(equiv) | Solvent<br>(mL)    | [O]                  | Acid (mL)         | Yields of<br><b>2a/3a</b> ,<br>% |
|-------|------------------------|--------------------|----------------------|-------------------|----------------------------------|
| 1     | Na (1)                 | EtOH (2)           | O <sub>2</sub>       | –                 | 22/36 <sup>1</sup>               |
| 2     | Na (2)                 | EtOH (2)           | O <sub>2</sub>       | –                 | 21/27 <sup>1</sup>               |
| 3     | Na (2)                 | EtOH (2)           | O <sub>2</sub>       | HCl (0.25)        | 30/35 <sup>1</sup>               |
| 4     | Na (5)                 | EtOH (2)           | O <sub>2</sub>       | HCl (0.25)        | 41/0                             |
| 5     | <b>Na (5)</b>          | <b>EtOH (2)</b>    | <b>O<sub>2</sub></b> | <b>HCl (0.25)</b> | <b>51/0<sup>2</sup></b>          |
| 6     | Na (5)                 | EtOH (2)           | O <sub>2</sub>       | –                 | 28/trace                         |
| 7     | Na (5)                 | EtOH (2)           | O <sub>2</sub>       | HCl (0.25)        | 44/0 <sup>2,3</sup>              |
| 8     | Na (5)                 | MeOH (2)           | O <sub>2</sub>       | HCl (0.25)        | trace/71 <sup>2</sup>            |
| 9     | <b>Na (5)</b>          | <b>MeOH (2)</b>    | <b>O<sub>2</sub></b> | <b>HCl (0.25)</b> | <b>0/78</b>                      |
| 10    | Na (5)                 | <i>i</i> -PrOH (2) | O <sub>2</sub>       | HCl (0.25)        | 35/0 <sup>2</sup>                |
| 11    | Na (5)                 | <i>n</i> -BuOH (2) | O <sub>2</sub>       | HCl (0.25)        | 46/0 <sup>2</sup>                |

|    |                                   |          |                                          |                                       |                   |
|----|-----------------------------------|----------|------------------------------------------|---------------------------------------|-------------------|
| 12 | Na (5)                            | TFE      | O <sub>2</sub>                           | HCl (0.25)                            | 0/75              |
| 13 | Na (5)                            | EtOH (2) | O <sub>2</sub>                           | H <sub>2</sub> SO <sub>4</sub> (0.25) | 38/0 <sup>2</sup> |
| 14 | K (5)                             | EtOH (2) | O <sub>2</sub>                           | HCl (0.25)                            | 40/0 <sup>2</sup> |
| 15 | Na <i>tert</i> -<br>pentoxide (5) | EtOH (2) | O <sub>2</sub>                           | HCl (0.25)                            | 37/0 <sup>2</sup> |
| 16 | NaOH (5)                          | EtOH (2) | 38% H <sub>2</sub> O <sub>2</sub> (0.5)  | –                                     | 0/62 <sup>2</sup> |
| 17 | NaOH (5)                          | EtOH (2) | 38% H <sub>2</sub> O <sub>2</sub> (0.05) | –                                     | 0/73 <sup>2</sup> |
| 18 | NaOH (5)                          | EtOH (2) | O <sub>2</sub>                           | HCl (0.25)                            | 23/0 <sup>2</sup> |
| 19 | –                                 | EtOH (2) | 3-CPBA (1.1 equiv)                       | –                                     | NR <sup>2</sup>   |

Conditions: dihydrothiophene **1a** (0.12mmol), dry solvent, rt, 1 h. Water (2 mL) or/and acid were added after evaporation of solvent. Isolated yields after centrifugation in Et<sub>2</sub>O (2×1 mL). <sup>1</sup>Products were isolated as a mixture. <sup>2</sup>Oxygen was bubbled (1 min) after Na dissolving. <sup>3</sup>Ice bath. TFE – trifluoroethanol.

### General procedure for derivatization of dihydrothiophenes **1** in ethanolic solution

Dihydrothiophene **1** (1.0 equiv) was dissolved in a freshly prepared solution of sodium ethoxide from sodium (5.0 equiv) and dry ethanol. The formed yellow solution was stirred at room temperature for 1 h and concentrated under reduced pressure. Water (2.0 mL), then concentrated HCl (0.25 mL) were added to the residue. The formed suspension was dissolved in DCM (3 mL), diluted with water (3 mL) and extracted twice. The organic layer was washed with water (5 mL), dried with anhydrous sodium sulfate, and concentrated under reduced pressure. The formed precipitate was centrifugated with cold diethyl ether, affording the derivatized products **2a-p** as a colorless powder.

*4-Cyano-2-hydroxy-3-morpholino-N-phenyl-1-thiaspiro[4.5]dec-3-ene-2-carboxamide (2a).* Dihydrothiophene **1a** (50 mg, 1.0 equiv, 0.12 mmol), sodium (13.0 mg, 5.0 equiv, 0.60 mmol) and dry ethanol (2.0 mL). Yield of **2a** 51% (24 mg), mp 248–250 °C. <sup>1</sup>H NMR (400 MHz, DMSO-*d*<sub>6</sub>): δ 9.82 (s, 1H), 8.25 (s, 1H), 7.69 (d, *J* = 7.6 Hz, 2H), 7.30 (t, *J* = 7.4 Hz, 2H), 7.08 (t, *J* = 7.5 Hz, 1H), 3.66 – 3.58 (m, 4H), 3.48 – 3.44 (m, 2H), 3.37 – 3.34 (m, 2H), 1.98 – 1.82 (m, 3H), 1.74 – 1.65 (m, 3H), 1.60 – 1.56 (m, 1H), 1.34 – 1.08 (m, 3H). <sup>13</sup>C{<sup>1</sup>H} NMR (100 MHz, DMSO-*d*<sub>6</sub>): δ 168.8, 158.0, 138.3, 128.5, 123.9, 120.4, 118.3, 90.3, 87.9, 65.7, 58.0, 48.8, 38.4, 24.4, 24.2, 23.4. HRMS (ESI) *m/z*: [M + Na]<sup>+</sup> Calcd for C<sub>21</sub>H<sub>25</sub>N<sub>3</sub>O<sub>3</sub>SN<sup>+</sup> 422.1509; Found 422.1503.

*Scale-up synthesis of product 2a.* Dihydrothiophene **1** (500 mg, 1.0 equiv, 1.17 mmol) was dissolved in a freshly prepared solution of sodium ethoxide from sodium (135 mg, 5.0 equiv, 5.87 mmol) and dry ethanol (5 mL). The formed yellow solution was stirred at room temperature for 1 h and concentrated under reduced pressure. Water (4.0 mL), then

concentrated HCl (1.5 mL) were added to the residue. The formed suspension was dissolved in DCM (10 mL), diluted with water (5 mL) and extracted twice. The organic layer was washed with water (10 mL), dried with anhydrous sodium sulfate, and concentrated under reduced pressure. The formed precipitate was centrifugated with cold diethyl ether (5 mL), affording product **2a** as a colorless powder (54%, 252 mg).

*4-Cyano-2-hydroxy-N-(4-methoxyphenyl)-3-morpholino-1-thiaspiro[4.5]dec-3-ene-2-carboxamide (2b)*. Dihydrothiophene **1b** (80 mg, 1.0 equiv, 0.17 mmol), sodium (20.0 mg, 5.0 equiv, 0.85 mmol) and dry ethanol (2.5 mL). Yield of **2b** 41% (31 mg), mp 198–200 °C. <sup>1</sup>H NMR (400 MHz, DMSO-*d*<sub>6</sub>): δ 9.69 (s, 1H), 8.15 (s, 1H), 7.58 (d, *J* = 9.0 Hz, 2H), 6.88 (d, *J* = 9.0 Hz, 2H), 3.72 (s, 3H), 3.65 – 3.58 (m, 4H), 3.49 – 3.43 (m, 2H), 3.39 – 3.33 (m, 2H), 1.94 – 1.83 (m, 3H), 1.74 – 1.65 (m, 3H), 1.60 – 1.57 (m, 1H), 1.32 – 1.23 (m, 2H), 1.15 – 1.07 (m, 1H). <sup>13</sup>C{<sup>1</sup>H} NMR (100 MHz, DMSO-*d*<sub>6</sub>): δ 168.4, 158.1, 155.7, 131.3, 121.9, 118.4, 113.7, 90.2, 87.9, 65.7, 58.0, 55.2, 48.7, 38.4, 24.4, 24.2, 23.4. HRMS (ESI) *m/z*: [M + H]<sup>+</sup> Calcd for C<sub>24</sub>H<sub>30</sub>N<sub>3</sub>O<sub>4</sub>S<sup>+</sup> 456.1951; Found 456.1958.

*4-Cyano-2-hydroxy-3-morpholino-N-phenyl-1-thiaspiro[4.6]undec-3-ene-2-carboxamide (2c)*. Dihydrothiophene **1c** (62 mg, 1.0 equiv, 0.14 mmol), sodium (16 mg, 5.0 equiv, 0.70 mmol) and dry ethanol (2.0 mL). Yield of **2c** 52% (30 mg), mp 244–245 °C. <sup>1</sup>H NMR (600 MHz, DMSO-*d*<sub>6</sub>): δ 9.83 (s, 1H, NH), 8.25 (s, 1H, OH), 7.69 (d, *J* = 8.0 Hz, 2H), 7.30 (t, *J* = 7.5 Hz, 2H), 7.08 (t, *J* = 7.3 Hz, 1H), 3.64 – 3.58 (m, 4H), 3.44 – 3.42 (m, 2H), 3.34 – 3.31 (m, 2H), 2.16 – 2.02 (m, 3H), 1.91 – 1.87 (m, 1H), 1.71 – 1.65 (m, 2H), 1.61 – 1.35 (m, 6H). <sup>13</sup>C{<sup>1</sup>H} NMR (150 MHz, DMSO-*d*<sub>6</sub>): δ 168.8, 157.6, 138.3, 128.6, 123.9, 120.4, 118.7, 90.4, 89.3, 65.7, 60.3, 48.8, 43.4, 42.5, 27.2, 27.2, 24.4, 23.3. HRMS (ESI) *m/z*: [M + H]<sup>+</sup> Calcd for C<sub>22</sub>H<sub>28</sub>N<sub>3</sub>O<sub>3</sub>S<sup>+</sup> 414.1846; Found 414.1844.

*4-Cyano-2-hydroxy-N-(4-methoxyphenyl)-3-morpholino-1-thiaspiro[4.6]undec-3-ene-2-carboxamide (2d)*. Dihydrothiophene **1d** (90 mg, 1.0 equiv, 0.19 mmol), sodium (22 mg, 5.0 equiv, 0.95 mmol) and dry ethanol (3.0 mL). Yield of **2d** 57% (48 mg), mp 175–177 °C. <sup>1</sup>H NMR (400 MHz, DMSO-*d*<sub>6</sub>): δ 9.71 (s, 1H), 8.17 (s, 1H), 7.58 (d, *J* = 9.1 Hz, 2H), 6.87 (d, *J* = 9.1 Hz, 2H), 3.72 (s, 3H), 3.65 – 3.56 (m, 4H), 3.45 – 3.41 (m, 2H), 3.36 – 3.30 (m, 2H), 2.16 – 2.01 (m, 3H), 1.92 – 1.86 (m, 1H), 1.72 – 1.36 (m, 8H). <sup>13</sup>C{<sup>1</sup>H} NMR (100 MHz, DMSO-*d*<sub>6</sub>): δ 168.4, 157.6, 155.7, 131.3, 121.9, 118.7, 113.7, 90.4, 89.3, 65.7, 60.3, 55.2, 48.8, 43.4, 42.5, 27.2, 27.1, 24.3, 23.3. HRMS (ESI) *m/z*: [M + H]<sup>+</sup> Calcd for C<sub>23</sub>H<sub>30</sub>N<sub>3</sub>O<sub>4</sub>S<sup>+</sup> 444.1951; Found 444.1957.

*N*-(4-Chlorophenyl)-4-cyano-2-hydroxy-3-morpholino-1-thiaspiro[4.6]undec-3-ene-2-carboxamide (**2e**). Dihydrothiophene **1e** (80 mg, 1.0 equiv, 0.17 mmol), sodium (19 mg, 5.0 equiv, 0.84 mmol) and dry ethanol (2.5 mL). Yield of **2e** 62% (47 mg), mp 239–241 °C. <sup>1</sup>H NMR (400 MHz, DMSO-*d*<sub>6</sub>): δ 10.00 (s, 1H), 8.27 (s, 1H), 7.74 (d, *J* = 9.0 Hz, 2H), 7.36 (d, *J* = 8.9 Hz, 2H), 3.65 – 3.56 (m, 4H), 3.45 – 3.39 (m, 2H), 3.36 – 3.29 (m, 2H), 2.17 – 2.01 (m, 3H), 1.92 – 1.86 (m, 1H), 1.72 – 1.35 (m, 9H). <sup>13</sup>C{<sup>1</sup>H} NMR (100 MHz, DMSO-*d*<sub>6</sub>): δ 169.0, 157.4, 137.3, 128.4, 127.6, 122.0, 118.6, 90.4, 89.4, 65.7, 60.3, 48.8, 43.3, 42.5, 27.2, 27.1, 24.4, 23.3. HRMS (ESI) *m/z*: [M + H]<sup>+</sup> Calcd for C<sub>22</sub>H<sub>27</sub>ClN<sub>3</sub>O<sub>3</sub>S<sup>+</sup> 448.1456; Found 448.1461.

4-Cyano-2-hydroxy-3-morpholino-*N*-phenyl-1-thiaspiro[4.7]dodec-3-ene-2-carboxamide (**2f**). Dihydrothiophene **1f** (82 mg, 1.0 equiv, 0.18 mmol), sodium (21 mg, 5.0 equiv, 0.90 mmol) and dry ethanol (2.5 mL). Yield of **2f** 60% (46 mg), mp 225–228 °C. <sup>1</sup>H NMR (400 MHz, DMSO-*d*<sub>6</sub>): δ 9.80 (s, 1H), 8.19 (s, 1H), 7.68 (d, *J* = 7.9 Hz, 2H), 7.30 (d, *J* = 7.4 Hz, 2H), 7.08 (t, *J* = 7.2 Hz, 1H), 3.63 – 3.59 (m, 4H), 3.47 – 3.36 (m, 4H), 2.28 – 2.22 (m, 1H), 2.15 – 2.04 (m, 3H), 1.81 – 1.75 (m, 2H), 1.59 – 1.48 (m, 8H). <sup>13</sup>C{<sup>1</sup>H} NMR (100 MHz, DMSO-*d*<sub>6</sub>): δ 168.8, 158.1, 138.3, 128.5, 123.9, 120.4, 119.0, 90.4, 88.7, 65.7, 60.2, 48.9, 38.4, 27.5, 24.2, 23.4, 23.3. HRMS (ESI) *m/z*: [M + H]<sup>+</sup> Calcd for C<sub>23</sub>H<sub>30</sub>N<sub>3</sub>O<sub>3</sub>S<sup>+</sup> 428.2002; Found 428.2001.

4-Cyano-2-hydroxy-*N*-(4-methoxyphenyl)-3-morpholino-1-thiaspiro[4.7]dodec-3-ene-2-carboxamide (**2g**). Dihydrothiophene **1g** (80 mg, 1.0 equiv, 0.16 mmol), sodium (19.0 mg, 5.0 equiv, 0.80 mmol) and dry ethanol (2.5 mL). Yield of **2g** 61% (46 mg), mp 215–217 °C. <sup>1</sup>H NMR (400 MHz, DMSO-*d*<sub>6</sub>): δ 9.69 (s, 1H), 8.11 (s, 1H), 7.58 (d, *J* = 9.0 Hz, 2H), 6.87 (d, *J* = 9.1 Hz, 2H), 3.72 (s, 3H), 3.67 – 3.56 (m, 4H), 3.46 – 3.41 (m, 2H), 3.37 – 3.31 (m, 2H), 2.27 – 2.22 (m, 1H), 2.14 – 2.09 (m, 3H), 1.83 – 1.72 (m, 2H), 1.58 – 1.48 (m, 8H). <sup>13</sup>C{<sup>1</sup>H} NMR (100 MHz, DMSO-*d*<sub>6</sub>): δ 168.4, 158.2, 155.7, 131.3, 121.9, 119.0, 113.7, 90.4, 88.6, 65.7, 60.1, 55.2, 48.9, 38.4, 27.5, 24.2, 23.4, 23.3. HRMS (ESI) *m/z*: [M + H]<sup>+</sup> Calcd for C<sub>24</sub>H<sub>32</sub>N<sub>3</sub>O<sub>4</sub>S<sup>+</sup> 458.2108; Found 458.2110.

*N*-(4-Chlorophenyl)-4-cyano-2-hydroxy-3-morpholino-1-thiaspiro[4.7]dodec-3-ene-2-carboxamide (**2h**). Dihydrothiophene **1h** (80 mg, 1.0 equiv, 0.16 mmol), sodium (19.0 mg, 5.0 equiv, 0.80 mmol) and dry ethanol (2.5 mL). Yield of **2h** 54% (41 mg), mp 226–228 °C. <sup>1</sup>H NMR (400 MHz, DMSO-*d*<sub>6</sub>): δ 9.99 (s, 1H), 8.24 (s, 1H), 7.73 (d, *J* = 8.9 Hz, 2H), 7.36 (d, *J* = 8.9 Hz, 2H), 3.66 – 3.56 (m, 4H), 3.45 – 3.40 (m, 2H), 3.36 – 3.33 (m, 2H), 2.28 – 2.22 (m, 1H), 2.14 – 2.02 (m, 3H), 1.83 – 1.70 (m, 2H), 1.59 – 1.44 (m, 8H). <sup>13</sup>C{<sup>1</sup>H} NMR (100 MHz, DMSO-*d*<sub>6</sub>): δ 169.0, 158.1, 137.3, 128.5, 127.7, 122.0, 119.0, 90.4, 88.7,

65.7, 60.2, 48.9, 38.4, 27.5, 24.2, 23.4, 23.3. HRMS (ESI)  $m/z$ :  $[M + H]^+$  Calcd for  $C_{23}H_{29}ClN_3O_3S^+$  462.1612; Found 462.1619.

*4-Cyano-N-(4-fluorophenyl)-2-hydroxy-3-morpholino-1-thiaspiro[4.7]dodec-3-ene-2-carboxamide (2i)*. Dihydrothiophene **1i** (80 mg, 1.0 equiv, 0.17 mmol), sodium (20.0 mg, 5.0 equiv, 0.85 mmol) and dry ethanol (2.5 mL). Yield of **2i** 55% (41 mg), mp 243–245 °C.  $^1H$  NMR (600 MHz, DMSO- $d_6$ ):  $\delta$  9.93 (s, 1H), 8.22 (s, 1H), 7.72 – 7.70 (m, 2H), 7.16 – 7.13 (m, 2H), 3.64 – 3.58 (m, 4H), 3.45 – 3.41 (m, 2H), 3.35 – 3.32 (m, 2H), 2.26 – 2.23 (m, 1H), 2.13 – 2.06 (m, 3H), 1.82 – 1.73 (m, 2H), 1.57 – 1.43 (m, 8H).  $^{13}C\{^1H\}$  NMR (150 MHz, DMSO- $d_6$ ):  $\delta$  168.9, 158.5 (d,  $J$  = 240.7 Hz), 158.1, 134.71 (d,  $J$  = 2.0 Hz), 122.3 (d,  $J$  = 7.8 Hz), 119.0, 115.1 (d,  $J$  = 22.2 Hz), 89.5 (d,  $J$  = 261.8 Hz), 65.8, 60.2, 48.9, 38.4, 27.5, 24.2, 23.4, 23.3. HRMS (ESI)  $m/z$ :  $[M + H]^+$  Calcd for  $C_{23}H_{29}FN_3O_3S^+$  446.1908; Found 446.1912.

*4-Cyano-2-hydroxy-3-morpholino-N-(p-tolyl)-1-thiaspiro[4.7]dodec-3-ene-2-carboxamide (2j)*. Dihydrothiophene **1j** (80 mg, 1.0 equiv, 0.17 mmol), sodium (20.0 mg, 5.0 equiv, 0.85 mmol) and dry ethanol (2.5 mL). Yield of **2j** 55% (41 mg), mp 214–217 °C.  $^1H$  NMR (400 MHz, DMSO- $d_6$ ):  $\delta$  9.70 (s, 1H), 8.14 (s, 1H), 7.55 (d,  $J$  = 8.2 Hz, 2H), 7.10 (d,  $J$  = 8.1 Hz, 2H), 3.64 – 3.57 (m, 4H), 3.46 – 3.40 (m, 2H), 3.37 – 3.34 (m, 2H), 2.25 – 2.22 (m, 4H), 2.14 – 2.07 (m, 3H), 1.80 – 1.71 (m, 2H), 1.56 – 1.43 (m, 8H).  $^{13}C\{^1H\}$  NMR (100 MHz, DMSO- $d_6$ ):  $\delta$  168.6, 158.2, 135.7, 132.9, 128.9, 120.4, 119.0, 90.4, 88.7, 65.7, 60.2, 48.9, 38.4, 27.5, 24.2, 23.4, 23.3, 20.4. HRMS (ESI)  $m/z$ :  $[M + H]^+$  Calcd for  $C_{24}H_{32}N_3O_3S^+$  442.2159; Found 442.2164.

*4-Cyano-2-hydroxy-N-phenyl-3-(piperidin-1-yl)-1-thiaspiro[4.7]dodec-3-ene-2-carboxamide (2k)*. Dihydrothiophene **1k** (60 mg, 1.0 equiv, 0.13 mmol), sodium (15 mg, 5.0 equiv, 0.65 mmol) and dry ethanol (2.5 mL). Yield of **2k** 53%, (30 mg), mp 253–255 °C (decomp.).  $^1H$  NMR (400 MHz, DMSO- $d_6$ ):  $\delta$  9.76 (s, 1H), 8.06 (s, 1H), 7.69 (d,  $J$  = 7.8 Hz, 2H), 7.30 (t,  $J$  = 7.9 Hz, 2H), 7.08 (t,  $J$  = 7.3 Hz, 1H), 3.45 – 3.40 (m, 2H), 3.34 (br s, 2H), 2.27 – 2.22 (m, 1H), 2.14 – 2.07 (m, 3H), 1.82 – 1.71 (m, 2H), 1.54 – 1.48 (m, 14H).  $^{13}C\{^1H\}$  NMR (100 MHz, DMSO- $d_6$ ):  $\delta$  168.9, 158.1, 138.4, 128.5, 123.8, 120.4, 119.5, 90.4, 86.7, 60.0, 49.9, 38.5, 27.5, 25.5, 24.2, 23.4, 23.3. HRMS (ESI)  $m/z$ :  $[M + H]^+$  Calcd for  $C_{24}H_{32}N_3O_2S^+$  426.2210; Found 426.2212.

*4-Cyano-3-(dimethylamino)-2-hydroxy-N-phenyl-1-thiaspiro[4.7]dodec-3-ene-2-carboxamide (2l) and 4-cyano-3-(dimethylamino)-N-phenyl-1-thiaspiro[4.7]dodec-3-ene-2-carboxamide (2l')*. Dihydrothiophene **1l** (74 mg, 1.0 equiv, 0.18 mmol), sodium (21.0

mg, 5.0 equiv, 0.90 mmol) and dry ethanol (2.5 mL). The products were isolated as a mixture (38 mg) in ratio **2l**:**2l'** = 1.0:1.25 Yield of **2l** 25% (17 mg) and **2l'** 32% (21 mg), mp 182–184 °C. <sup>1</sup>H NMR (400 MHz, DMSO-*d*<sub>6</sub>): δ 10.23 (s, 1H), 9.78 (s, 1H), 8.05 (s, 1H), 7.69 (d, *J* = 7.9 Hz, 2H), 7.55 (d, *J* = 7.8 Hz, 2H), 7.34 – 7.28 (m, 4H), 7.08 (t, *J* = 7.4 Hz, 2H), 4.90 (s, 1H), 3.04 (s, 6H), 3.02 (s, 6H), 2.27 – 2.05 (m, 9H), 1.81 – 1.67 (m, 4H), 1.51 – 1.48 (m, 15H). <sup>13</sup>C{<sup>1</sup>H} NMR (100 MHz, DMSO-*d*<sub>6</sub>): δ 168.7, 168.0, 158.3, 156.7, 138.7, 138.3, 128.9, 128.5, 123.9, 123.8, 120.4, 120.1, 119.8, 119.3, 90.8, 87.1, 85.7, 64.4, 60.5, 52.3, 41.7, 41.7, 28.0, 27.5, 27.5, 27.1, 24.2, 24.0, 23.7, 23.4, 23.3, 23.2. HRMS (ESI) *m/z*: [M + H]<sup>+</sup> Calcd for C<sub>21</sub>H<sub>28</sub>N<sub>3</sub>O<sub>2</sub>S<sup>+</sup> 386.1897; Found 386.1900; [M + H]<sup>+</sup> Calcd for C<sub>21</sub>H<sub>28</sub>N<sub>3</sub>OS<sup>+</sup> 370.1947; Found 370.1952.

*4-Cyano-N-phenyl-3-(pyrrolidin-1-yl)-1-thiaspiro[4.7]dodec-3-ene-2-carboxamide* (**2m**). Dihydrothiophene **1m** (90 mg, 1.0 equiv, 0.21 mmol), sodium (24 mg, 5.0 equiv, 1.05 mmol) and dry ethanol (3.0 mL). Yield of **2m** 67%, (56 mg), mp 123–125 °C. <sup>1</sup>H NMR (400 MHz, CDCl<sub>3</sub>-*d*): δ 8.22 (s, 1H), 7.50 (d, *J* = 7.9 Hz, 2H), 7.34 (t, *J* = 7.8 Hz, 2H), 7.14 (t, *J* = 7.4 Hz, 1H), 4.61 (s, 1H), 3.71 – 3.65 (m, 4H), 2.41 – 2.29 (m, 2H), 2.19 – 2.13 (m, 1H), 2.07 – 2.01 (m, 1H), 1.94 – 1.82 (m, 6H), 1.72 – 1.49 (m, 9H). <sup>13</sup>C{<sup>1</sup>H} NMR (100 MHz, CDCl<sub>3</sub>-*d*): δ 167.4, 153.6, 137.4, 129.3, 125.1, 120.7, 120.0, 85.5, 65.8, 54.6, 50.8, 40.8, 40.1, 28.2, 27.8, 25.6, 24.8, 24.2, 23.7. HRMS (ESI) *m/z*: [M + H]<sup>+</sup> Calcd for C<sub>23</sub>H<sub>30</sub>N<sub>3</sub>OS<sup>+</sup> 396.2104; Found 396.2107.

*3-(Azepan-1-yl)-4-cyano-N-phenyl-1-thiaspiro[4.7]dodec-3-ene-2-carboxamide* (**2n**). Dihydrothiophene **1n** (74 mg, 1.0 equiv, 0.16 mmol), sodium (18 mg, 5.0 equiv, 0.80 mmol) and dry ethanol (2.5 mL). Yield of **2n** 60%, (40 mg), mp 127–131 °C. <sup>1</sup>H NMR (400 MHz, CDCl<sub>3</sub>-*d*): δ 8.12 (s, 1H), 7.49 (d, *J* = 7.8 Hz, 2H), 7.34 (t, *J* = 7.6 Hz, 2H), 7.14 (t, *J* = 7.1 Hz, 1H), 4.67 (s, 1H), 3.70 – 3.60 (m, 4H), 2.43 – 2.37 (m, 1H), 2.34 – 2.28 (m, 1H), 2.17 – 2.11 (m, 1H), 2.04 – 1.98 (m, 1H), 1.89 – 1.83 (m, 4H), 1.76 – 1.48 (m, 16H). <sup>13</sup>C{<sup>1</sup>H} NMR (100 MHz, CDCl<sub>3</sub>-*d*): δ 167.6, 154.8, 137.5, 129.3, 125.0, 120.3, 120.0, 85.6, 65.5, 54.0, 53.0, 40.6, 40.3, 29.2, 28.2, 27.7, 27.0, 24.8, 24.1, 23.6. HRMS (ESI) *m/z*: [M + H]<sup>+</sup> Calcd for C<sub>25</sub>H<sub>34</sub>N<sub>3</sub>OS<sup>+</sup> 424.2417; Found 424.2417.

*3-(Azepan-1-yl)-4-cyano-N-phenyl-1-thiaspiro[4.5]dec-3-ene-2-carboxamide* (**2o**). Dihydrothiophene **1o** (60 mg, 1.0 equiv, 0.14 mmol), sodium (16 mg, 5.0 equiv, 0.70 mmol) and dry ethanol (2.5 mL). Yield of **2o** 66%, (36 mg), mp 186–188 °C. <sup>1</sup>H NMR (400 MHz, CDCl<sub>3</sub>-*d*): δ 8.08 (s, 1H), 7.49 (d, *J* = 7.8 Hz, 2H), 7.33 (t, *J* = 7.9 Hz, 2H), 7.14 (t, *J* = 7.4 Hz, 1H), 4.67 (s, 1H), 3.68 – 3.57 (m, 4H), 2.13 – 2.06 (m, 1H), 1.95 – 1.93 (m, 2H), 1.85 – 1.74 (m, 7H), 1.65 – 1.51 (m, 6H), 1.39 – 1.29 (m, 1H), 1.22 – 1.11 (m, 1H). <sup>13</sup>C{<sup>1</sup>H} NMR (100 MHz, CDCl<sub>3</sub>-*d*): δ 167.6, 154.8, 137.5, 129.3, 125.0, 120.3, 120.0, 85.6, 65.5, 54.0, 53.0, 40.6, 40.3, 29.2, 28.2, 27.7, 27.0, 24.8, 24.1, 23.6.

NMR (100 MHz, CDCl<sub>3</sub>-d):  $\delta$  167.9, 154.5, 137.5, 129.3, 125.0, 120.0, 84.8, 63.2, 54.2, 52.8, 40.5, 40.0, 29.1, 26.9, 24.7, 23.8. HRMS (ESI)  $m/z$ : [M + H]<sup>+</sup> Calcd for C<sub>23</sub>H<sub>30</sub>N<sub>3</sub>OS<sup>+</sup> 396.2104; Found 396.2110.

### General procedure for deacetylation of dihydrothiophenes **1** in methanolic solution

Dihydrothiophene **1** (1.0 equiv) was dissolved in a freshly prepared solution of sodium methoxide from sodium (5.0 equiv) and dry methanol. The formed colorless suspension was stirred at room temperature for 1 h and concentrated under reduced pressure. Water (2.0 mL), then concentrated HCl (0.25 mL) were added to the residue. The formed suspension was dissolved in DCM (3 mL), diluted with water (3 mL) and extracted twice. The organic layer was washed with water (5 mL), dried with anhydrous sodium sulfate, and concentrated under reduced pressure. The formed precipitate was centrifugated with cold diethyl ether and hexane (1:1), affording the deacetylated product **3a–k**, **2o,m,n** as a colorless powder.

#### *4-Cyano-3-morpholino-N-phenyl-1-thiaspiro[4.5]dec-3-ene-2-carboxamide* (**3a**).

Dihydrothiophene **1a** (47 mg, 1.0 equiv, 0.11 mmol), sodium (13 mg, 5.0 equiv, 0.55 mmol) and dry methanol (2.0 mL). Yield of **3a** 78%, (33 mg), mp 193–195 °C. <sup>1</sup>H NMR (400 MHz, DMSO-*d*<sub>6</sub>):  $\delta$  10.21 (s, 1H), 7.55 (d,  $J$  = 7.7 Hz, 2H), 7.33 (t,  $J$  = 7.9 Hz, 2H), 7.09 (t,  $J$  = 7.4 Hz, 1H), 4.93 (s, 1H), 3.66 – 3.56 (m, 4H), 3.45 – 3.43 (m, 4H), 2.03 (d,  $J$  = 12.9 Hz, 1H), 1.94 – 1.87 (m, 1H), 1.80 – 1.56 (m, 5H), 1.47 – 1.36 (m, 1H), 1.24 – 1.05 (m, 2H). <sup>13</sup>C{<sup>1</sup>H} NMR (100 MHz, DMSO-*d*<sub>6</sub>):  $\delta$  167.9, 156.0, 138.6, 128.9, 123.8, 119.4, 118.5, 87.8, 65.5, 62.1, 52.0, 48.8, 24.3, 23.8, 23.5. HRMS (ESI)  $m/z$ : [M + H]<sup>+</sup> Calcd for C<sub>21</sub>H<sub>26</sub>N<sub>3</sub>O<sub>2</sub>S<sup>+</sup> 384.1740; Found 384.1743.

#### *4-Cyano-N-(4-methoxyphenyl)-3-morpholino-1-thiaspiro[4.5]dec-3-ene-2-carboxamide*

(**3b**). Dihydrothiophene **1b** (50 mg, 1.0 equiv, 0.11 mmol), sodium (13 mg, 5.0 equiv, 0.55 mmol) and dry methanol (2.5 mL). Yield of **3b** 73%, (33 mg), mp 84–86 °C. <sup>1</sup>H NMR (400 MHz, CDCl<sub>3</sub>-d):  $\delta$  8.19 (s, 1H), 7.37 (d,  $J$  = 9.0 Hz, 2H), 6.89 (d,  $J$  = 9.0 Hz, 1H), 4.74 (s, 1H), 3.80 (s, 3H), 3.77 – 3.69 (m, 6H), 3.56 – 3.48 (m, 2H), 2.09 – 1.93 (m, 2H), 1.89 – 1.80 (m, 4H), 1.71 – 1.59 (m, 2H), 1.44 – 1.33 (m, 1H), 1.22 – 1.17 (m, 1H). <sup>13</sup>C{<sup>1</sup>H} NMR (100 MHz, CDCl<sub>3</sub>-d):  $\delta$  166.6, 157.2, 155.8, 130.2, 121.8, 118.3, 114.5, 89.9, 66.6, 62.9, 55.7, 54.2, 50.1, 40.4, 39.9, 24.7, 24.3, 24.0. HRMS (ESI)  $m/z$ : [M + H]<sup>+</sup> Calcd for C<sub>22</sub>H<sub>28</sub>N<sub>3</sub>O<sub>3</sub>S<sup>+</sup> 414.1846; Found 414.1852.

*3-(Azepan-1-yl)-4-cyano-N-phenyl-1-thiaspiro[4.5]dec-3-ene-2-carboxamide* (**2o**).

Dihydrothiophene **1o** (60 mg, 1.0 equiv, 0.14 mmol), sodium (16 mg, 5.0 equiv, 0.68 mmol) and dry methanol (2.5 mL). Yield of **2o** 67%, (36 mg), mp 186–188 °C. <sup>1</sup>H NMR (400 MHz, CDCl<sub>3</sub>-d): δ 8.08 (s, 1H), 7.49 (d, *J* = 7.8 Hz, 2H), 7.33 (t, *J* = 7.9 Hz, 2H), 7.14 (t, *J* = 7.4 Hz, 1H), 4.67 (s, 1H), 3.68 – 3.57 (m, 4H), 2.13 – 2.06 (m, 1H), 1.95 – 1.93 (m, 2H), 1.85 – 1.74 (m, 7H), 1.65 – 1.51 (m, 6H), 1.39 – 1.29 (m, 1H), 1.22 – 1.11 (m, 1H).

*4-Cyano-3-morpholino-N-phenyl-1-thiaspiro[4.6]undec-3-ene-2-carboxamide* (**3c**).

Dihydrothiophene **1c** (61 mg, 1.0 equiv, 0.14 mmol), sodium (16 mg, 5.0 equiv, 0.70 mmol) and dry methanol (2.5 mL). The product **3c** was purified on SiO<sub>2</sub> (eluent DCM/EtOAc, gradient 25:0 to 22:3). Yield of **3c** 75%, (41 mg), mp 167–169 °C. <sup>1</sup>H NMR (400 MHz, CDCl<sub>3</sub>-d): δ 8.41 (s, 1H), 7.50 (d, *J* = 7.8 Hz, 2H), 7.38 (t, *J* = 7.9 Hz, 2H), 7.19 (t, *J* = 7.4 Hz, 1H), 4.79 (s, 1H), 3.81 – 3.70 (m, 6H), 3.57 – 3.50 (m, 2H), 2.32 – 2.11 (m, 3H), 2.06 – 2.00 (m, 1H), 1.85 – 1.79 (m, 2H), 1.73 – 1.54 (m, 6H). <sup>13</sup>C{<sup>1</sup>H} NMR (100 MHz, CDCl<sub>3</sub>-d): δ 166.6, 155.3, 137.2, 129.4, 125.2, 119.9, 118.6, 91.4, 66.6, 65.2, 54.3, 50.1, 44.7, 43.0, 27.9, 27.7, 24.6, 24.0. HRMS (ESI) *m/z*: [M + H]<sup>+</sup> Calcd for C<sub>22</sub>H<sub>28</sub>N<sub>3</sub>O<sub>2</sub>S<sup>+</sup> 398.1897; Found 398.1902.

*4-Cyano-N-(4-methoxyphenyl)-3-morpholino-1-thiaspiro[4.6]undec-3-ene-2-*

*carboxamide* (**3d**). Dihydrothiophene **1d** (57 mg, 1.0 equiv, 0.12 mmol), sodium (14 mg, 5.0 equiv, 0.61 mmol) and dry methanol (2.5 mL). Yield of **3d** 66%, (34 mg), mp 115–117 °C. <sup>1</sup>H NMR (400 MHz, CDCl<sub>3</sub>-d): δ 8.31 (s, 1H), 7.37 (d, *J* = 8.9 Hz, 2H), 6.87 (d, *J* = 8.9 Hz, 2H), 4.74 (s, 1H), 3.79 – 3.67 (m, 3H+6H), 3.51 – 3.48 (m, 2H), 2.29 – 2.22 (m, 1H), 2.12 (br s, 2H), 2.01 – 1.96 (m, 1H), 1.79 (br s, 2H), 1.66 – 1.54 (m, 6H). <sup>13</sup>C{<sup>1</sup>H} NMR (100 MHz, CDCl<sub>3</sub>-d): δ 166.6, 157.1, 155.4, 130.3, 121.8, 114.5, 91.3, 66.6, 65.2, 55.6, 54.0, 50.1, 44.6, 43.0, 27.9, 27.7, 24.6, 24.0. HRMS (ESI) *m/z*: [M + H]<sup>+</sup> Calcd for C<sub>23</sub>H<sub>30</sub>N<sub>3</sub>O<sub>3</sub>S<sup>+</sup> 428.2002; Found 428.2007.

*N-(4-Chlorophenyl)-4-cyano-3-morpholino-1-thiaspiro[4.6]undec-3-ene-2-carboxamide*

(**3e**). Dihydrothiophene **1e** (50 mg, 1.0 equiv, 0.11 mmol), sodium (12 mg, 5.0 equiv, 0.55 mmol) and dry methanol (2.5 mL). Yield of **3e** 74%, (35 mg), mp 143–145 °C. <sup>1</sup>H NMR (400 MHz, CDCl<sub>3</sub>-d): δ 8.46 (s, 1H), 7.44 (d, *J* = 8.8 Hz, 2H), 7.32 (d, *J* = 8.8 Hz, 2H), 4.77 (s, 1H), 3.78 – 3.67 (m, 6H), 3.54 – 3.49 (m, 2H), 2.30 – 2.23 (m, 1H), 2.20 – 1.97 (m, 3H), 1.83 – 1.77 (m, 2H), 1.70 – 1.55 (m, 6H). <sup>13</sup>C{<sup>1</sup>H} NMR (100 MHz, CDCl<sub>3</sub>-d): δ 166.7, 155.1, 135.9, 130.2, 129.4, 121.1, 118.5, 91.6, 66.6, 65.3, 54.1, 50.2, 49.4, 44.7, 43.0, 27.9, 27.7, 24.7, 24.0. HRMS (ESI) *m/z*: [M + H]<sup>+</sup> Calcd for C<sub>22</sub>H<sub>27</sub>ClN<sub>3</sub>O<sub>2</sub>S<sup>+</sup> 432.1507; Found 432.1513.



*4-Cyano-3-morpholino-N-phenyl-1-thiaspiro[4.7]dodec-3-ene-2-carboxamide* (**3f**).

Dihydrothiophene **1f** (80 mg, 1.0 equiv, 0.18 mmol), sodium (20 mg, 5.0 equiv, 0.88 mmol) and dry methanol (3.0 mL). Yield of **3f** 76%, (55 mg), mp 107–109 °C. <sup>1</sup>H NMR (400 MHz, CDCl<sub>3</sub>-d): δ 8.52 (s, 1H), 7.49 (d, *J* = 7.7 Hz, 2H), 7.36 (t, *J* = 7.9 Hz, 2H), 7.16 (t, *J* = 7.4 Hz, 1H), 4.78 (s, 1H), 3.81 – 3.66 (m, 6H), 3.56 – 3.47 (m, 2H), 2.42 – 2.36 (m, 1H), 2.32 – 2.25 (m, 1H), 2.18 – 2.12 (m, 1H), 2.07 – 2.01 (m, 1H), 1.91 – 1.82 (m, 2H), 1.79 – 1.70 (m, 1H), 1.67 – 1.52 (m, 7H). <sup>13</sup>C{<sup>1</sup>H} NMR (100 MHz, CDCl<sub>3</sub>-d): δ 166.5, 156.1, 137.3, 129.3, 125.2, 119.9, 118.8, 90.9, 66.6, 65.0, 54.0, 50.3, 41.1, 39.2, 28.2, 27.7, 24.5, 24.1, 23.9. HRMS (ESI) *m/z*: [M + H]<sup>+</sup> Calcd for C<sub>23</sub>H<sub>30</sub>N<sub>3</sub>O<sub>2</sub>S<sup>+</sup> 412.2053; Found 412.2058.

*4-Cyano-N-(4-methoxyphenyl)-3-morpholino-1-thiaspiro[4.7]dodec-3-ene-2-*

*carboxamide* (**3g**). Dihydrothiophene **1g** (80 mg, 1.0 equiv, 0.16 mmol), sodium (19 mg, 5.0 equiv, 0.83 mmol) and dry methanol (3.0 mL). The product **3g** was purified on neutral Al<sub>2</sub>O<sub>3</sub> (eluent PE/EtOAc, gradient 25:0 to 20:30). Yield of **3g** 55% (40 mg), mp 154–156 °C. <sup>1</sup>H NMR (400 MHz, CDCl<sub>3</sub>-d): δ 8.43 (s, 1H), 7.38 (d, *J* = 9.0 Hz, 2H), 6.88 (d, *J* = 9.0 Hz, 2H), 4.76 (s, 1H), 3.79 (s, 3H), 3.78 – 3.77 (m, 1H), 3.76 – 3.74 (m, 1H), 3.73 – 3.67 (m, 4H), 3.53 – 3.48 (m, 2H), 2.41 – 2.36 (m, 1H), 2.31 – 2.24 (m, 1H), 2.18 – 2.11 (m, 1H), 2.06 – 2.00 (m, 1H), 1.90 – 1.81 (m, 2H), 1.79 – 1.71 (m, 1H), 1.65 – 1.52 (m, 7H). <sup>13</sup>C{<sup>1</sup>H} NMR (100 MHz, CDCl<sub>3</sub>-d): δ 166.4, 157.1, 156.2, 130.3, 121.8, 118.9, 114.5, 90.7, 66.6, 65.0, 55.7, 53.8, 50.3, 41.0, 39.2, 28.2, 27.7, 24.5, 24.1, 23.9. HRMS (ESI) *m/z*: [M + H]<sup>+</sup> Calcd for C<sub>24</sub>H<sub>32</sub>N<sub>3</sub>O<sub>3</sub>S<sup>+</sup> 442.2159; Found 442.2164.

*N-(4-Chlorophenyl)-4-cyano-3-morpholino-1-thiaspiro[4.7]dodec-3-ene-2-carboxamide*

(**3h**). Dihydrothiophene **1h** (66 mg, 1.0 equiv, 0.14 mmol), sodium (16 mg, 5.0 equiv, 0.70 mmol) and dry methanol (2.5 mL). Yield of **3h** 71%, (43 mg), mp 167–169 °C. <sup>1</sup>H NMR (400 MHz, CDCl<sub>3</sub>-d): δ 8.55 (s, 1H), 7.45 (d, *J* = 8.6 Hz, 2H), 7.31 (d, *J* = 8.6 Hz, 2H), 4.77 (s, 1H), 3.79 – 3.68 (m, 6H), 3.52 – 3.47 (m, 2H), 2.41 – 2.35 (m, 1H), 2.29 – 2.23 (m, 1H), 2.17 – 2.09 (m, 1H), 2.06 – 2.00 (m, 1H), 1.88 – 1.84 (m, 2H), 1.76 – 1.71 (m, 1H), 1.66 – 1.52 (m, 7H). <sup>13</sup>C{<sup>1</sup>H} NMR (100 MHz, CDCl<sub>3</sub>-d): δ 166.5, 156.0, 135.8, 130.2, 129.4, 121.1, 118.8, 90.9, 66.6, 65.1, 53.8, 50.3, 41.1, 39.2, 28.2, 27.6, 24.5, 24.1, 23.8. HRMS (ESI) *m/z*: [M + H]<sup>+</sup> Calcd for C<sub>23</sub>H<sub>29</sub>ClN<sub>3</sub>O<sub>2</sub>S<sup>+</sup> 446.1663; Found 446,1672.

*4-Cyano-N-(4-fluorophenyl)-3-morpholino-1-thiaspiro[4.7]dodec-3-ene-2-carboxamide*

(**3i**). Dihydrothiophene **1i** (70 mg, 1.0 equiv, 0.15 mmol), sodium (17 mg, 5.0 equiv, 0.74 mmol) and dry methanol (2.5 mL). Yield of **3i** 68%, (43 mg), mp 207–209 °C. <sup>1</sup>H NMR (600 MHz, CDCl<sub>3</sub>-d): δ 8.54 (s, 1H), 7.46 – 7.44 (m, 2H), 7.04 (t, *J* = 8.5 Hz, 2H), 4.76 (s, 1H), 3.79 – 3.74 (m, 2H), 3.72 – 3.68 (m, 4H), 3.53 – 3.47 (m, 2H), 2.39 – 2.36 (m, 1H),

2.28 – 2.24 (m, 1H), 2.15 – 2.11 (m, 1H), 2.04 – 2.00 (m, 1H), 1.88 – 1.81 (m, 2H), 1.76 – 1.70 (m, 1H), 1.64 – 1.51 (m, 7H).  $^{13}\text{C}\{^1\text{H}\}$  NMR (150 MHz,  $\text{CDCl}_3$ -d):  $\delta$  166.6, 159.8 (d,  $J = 244.8$  Hz), 156.1, 133.3 (d,  $J = 2.6$  Hz), 121.8 (d,  $J = 7.9$  Hz), 118.9, 116.0 (d,  $J = 22.6$  Hz), 90.7, 66.6, 65.0, 53.6, 50.2, 40.9, 39.1, 28.1, 27.6, 24.5, 24.0, 23.8. HRMS (ESI)  $m/z$ :  $[\text{M} + \text{H}]^+$  Calcd for  $\text{C}_{23}\text{H}_{29}\text{FN}_3\text{O}_2\text{S}^+$  430.1959; Found 430.1965.

*4-Cyano-3-morpholino-N-(p-tolyl)-1-thiaspiro[4.7]dodec-3-ene-2-carboxamide* (**3j**).

Dihydrothiophene **1j** (50 mg, 1.0 equiv, 0.11 mmol), sodium (13 mg, 5.0 equiv, 0.55 mmol) and dry methanol (2.5 mL). Yield of **3j** 64%, (29 mg), mp 110–113 °C.  $^1\text{H}$  NMR (400 MHz,  $\text{DMSO}-d_6$ ):  $\delta$  10.12 (s, 1H), 7.43 (d,  $J = 6.8$  Hz, 2H), 7.13 (d,  $J = 6.9$  Hz, 2H), 4.95 (s, 1H), 3.60 (br s, 4H), 3.42 (br s, 4H), 2.26 – 2.19 (m, 6H), 1.98 – 1.92 (m, 1H), 1.79 – 1.70 (m, 2H), 1.49 (br s, 7H).  $^{13}\text{C}\{^1\text{H}\}$  NMR (100 MHz,  $\text{DMSO}-d_6$ ):  $\delta$  167.8, 156.6, 136.1, 132.8, 129.2, 119.4, 119.1, 88.5, 65.6, 64.0, 52.0, 48.9, 30.7, 27.9, 27.1, 23.9, 23.7, 23.2, 20.4. HRMS (ESI)  $m/z$ :  $[\text{M} + \text{H}]^+$  Calcd for  $\text{C}_{24}\text{H}_{32}\text{N}_3\text{O}_2\text{S}^+$  426.2210; Found 426.2214.

*4-Cyano-N-phenyl-3-(pyrrolidin-1-yl)-1-thiaspiro[4.7]dodec-3-ene-2-carboxamide* (**2m**).

Dihydrothiophene **1m** (60 mg, 1.0 equiv, 0.14 mmol), sodium (16 mg, 5.0 equiv, 0.70 mmol) and dry methanol (2.5 mL). Yield of **2m** 66%, (36 mg), mp 123–125 °C.  $^1\text{H}$  NMR (400 MHz,  $\text{CDCl}_3$ -d):  $\delta$  8.22 (s, 1H), 7.50 (d,  $J = 7.9$  Hz, 2H), 7.34 (t,  $J = 7.8$  Hz, 2H), 7.14 (t,  $J = 7.4$  Hz, 1H), 4.61 (s, 1H), 3.71 – 3.65 (m, 4H), 2.41 – 2.29 (m, 2H), 2.19 – 2.13 (m, 1H), 2.07 – 2.01 (m, 1H), 1.94 – 1.82 (m, 6H), 1.72 – 1.49 (m, 8H).

*3-(Azepan-1-yl)-4-cyano-N-phenyl-1-thiaspiro[4.7]dodec-3-ene-2-carboxamide* (**2n**).

Dihydrothiophene **1n** (60 mg, 1.0 equiv, 0.13 mmol), sodium (15 mg, 5.0 equiv, 0.65 mmol) and dry methanol (2.5 mL). Yield of **2n** 60%, (32 mg), mp 128–130 °C.  $^1\text{H}$  NMR (400 MHz,  $\text{CDCl}_3$ -d):  $\delta$  8.12 (s, 1H), 7.49 (d,  $J = 7.8$  Hz, 2H), 7.34 (t,  $J = 7.6$  Hz, 2H), 7.14 (t,  $J = 7.1$  Hz, 1H), 4.67 (s, 1H), 3.70 – 3.60 (m, 4H), 2.43 – 2.37 (m, 1H), 2.34 – 2.28 (m, 1H), 2.17 – 2.11 (m, 1H), 2.04 – 1.98 (m, 1H), 1.89 – 1.83 (m, 4H), 1.76 – 1.48 (m, 14H).

*4-Cyano-N-phenyl-3-(piperidin-1-yl)-1-thiaspiro[4.7]dodec-3-ene-2-carboxamide* (**3k**).

Dihydrothiophene **1k** (60 mg, 1.0 equiv, 0.13 mmol), sodium (15 mg, 5.0 equiv, 0.65 mmol) and dry methanol (2.5 mL). Yield of **3k** 70%, (38 mg), mp 177–178 °C.  $^1\text{H}$  NMR (400 MHz,  $\text{CDCl}_3$ -d):  $\delta$  8.29 (s, 1H), 7.49 (d,  $J = 7.8$  Hz, 2H), 7.34 (t,  $J = 7.6$  Hz, 2H), 7.14 (t,  $J = 7.3$  Hz, 1H), 4.77 (s, 1H), 3.61 – 3.58 (m, 2H), 3.50 – 3.41 (m, 2H), 2.40 – 2.26 (m, 2H), 2.18 – 2.12 (m, 1H), 2.06 – 2.00 (m, 1H), 1.89 – 1.80 (m, 2H), 1.73 – 1.50 (m, 14H).  $^{13}\text{C}\{^1\text{H}\}$  NMR (100 MHz,  $\text{CDCl}_3$ -d):  $\delta$  167.3, 156.0, 137.5, 129.2, 125.0, 120.0, 119.6,

88.9, 64.8, 54.3, 51.4, 41.1, 39.6, 28.2, 27.7, 26.1, 24.5, 24.2, 24.0, 23.9. HRMS (ESI)  $m/z$ :  $[M + H]^+$  Calcd for  $C_{24}H_{32}N_3OS^+$  410.2261; Found 410.2267.

### General procedure for derivatization of dihydrothiophenes **4a–f** in ethanolic solution. Method A

Dihydrothiophene **4** (1.0 equiv) was dissolved in a freshly prepared solution of sodium ethoxide from sodium (5.0 equiv) and dry ethanol. The formed solution was stirred at room temperature for 1 h and concentrated under reduced pressure. Water (2.0 mL), then concentrated HCl (0.25 mL) were added to the residue. The formed suspension was dissolved in DCM (3 mL), diluted with water (3 mL) and extracted twice. The organic layer was washed with water (5 mL), dried with anhydrous sodium sulfate, and concentrated under reduced pressure. The formed precipitate was centrifugated with solvent (cold diethyl ether for **5a**, hexane for **5b**, hexane/ diethyl ether 1:1 for **5c–f**), affording the derivatized product **5a–f** as colorless powders.

### Method B (one-pot)

A mixture of thioamide (1.0 equiv), 2-diazo-3-oxo-*N*-phenylbutanamide (1.5 equiv) and  $Rh_2(Piv)_4$  (0.5 mol %) in chloroform (1.5 mL) was stirred at room temperature for 14 h. After the completion of the reaction, the solvent was evaporated, and the residue was dissolved in a freshly prepared solution of sodium ethoxide from sodium (5.0 equiv) and dry ethanol. The formed solution was stirred at room temperature for 1 h and concentrated under reduced pressure. Water (2.0 mL), then concentrated HCl (0.25 mL) was added to the residue. The formed suspension was dissolved in DCM (3 mL), diluted with water (3 mL) and extracted twice. The organic layer was washed with water (5 mL), dried with anhydrous sodium sulfate and concentrated under reduced pressure. The purification of the crude product by column chromatography on  $SiO_2$  afforded product **5a** as a colorless powder.

*4-Cyano-3-morpholino-N-phenyl-2-thiaspiro[4.5]dec-3-ene-1-carboxamide (5a).*

**Method A.** Dihydrothiophene **4a** (80 mg, 1.0 equiv, 0.19 mmol), sodium (22 mg, 5.0 equiv, 0.94 mmol) and dry ethanol (3.0 mL). Yield of **5a** 74% (53 mg), mp 122–124 °C.  $^1H$  NMR (400 MHz,  $DMSO-d_6$ ):  $\delta$  9.80 (s, 1H), 8.19 (s, 1H), 7.68 (d,  $J = 7.9$  Hz, 2H), 7.30 (d,  $J = 7.4$  Hz, 2H), 7.08 (t,  $J = 7.2$  Hz, 1H), 3.63 – 3.59 (m, 4H), 3.47 – 3.36 (m, 4H), 2.28 – 2.22 (m, 1H), 2.15 – 2.04 (m, 3H), 1.81 – 1.75 (m, 2H), 1.59 – 1.48 (m, 8H).  $^{13}C\{^1H\}$  NMR (100 MHz,  $CDCl_3-d$ ):  $\delta$  167.4, 162.6, 137.2, 129.2, 125.1, 120.5, 119.1, 80.3, 77.4,

66.4, 55.3, 54.5, 51.1, 35.2, 32.3, 25.3, 22.9. HRMS (ESI)  $m/z$ :  $[M + H]^+$  Calcd for  $C_{21}H_{26}N_3O_2S^+$  384.1740; Found 384.1740.

**Method B.** 2-Cyclohexylidene-3-morpholino-3-thioxopropanenitrile (64 mg, 1.0 equiv, 0.25 mmol), 2-diazo-3-oxo-*N*-phenylbutanamide (78 mg, 1.5 equiv, 0.38 mmol),  $Rh_2(Piv)_4$  (1.17 mg), chloroform (1.5 mL). Then sodium (9.2 mg, 2.0 equiv, 0.40 mmol) and dry ethanol (2.0 mL). After the purification of the crude product by column chromatography on  $SiO_2$  (DCM/EtOAc, gradient 25:0 to 20:5) and evaporation of the solvent under reduced pressure, the obtained residue was triturated with *n*-hexane and centrifugated, affording **5a** as a colorless powder (64%, 63 mg), mp 122–124 °C.

*4-Cyano-3-morpholino-N-phenyl-2-thiaspiro[4.4]non-3-ene-1-carboxamide* (**5b**).

Dihydrothiophene **4b** (80 mg, 1.0 equiv, 0.19 mmol), sodium (22 mg, 5.0 equiv, 0.97 mmol) and dry ethanol (3.0 mL). Yield of **5b** 58% (42 mg), mp 151–152 °C.  $^1H$  NMR (400 MHz,  $CDCl_3-d$ ):  $\delta$  7.85 (s, 1H), 7.47 (d,  $J = 7.8$  Hz, 2H), 7.35 (t,  $J = 7.7$  Hz, 2H), 7.16 (t,  $J = 7.6$  Hz, 1H), 3.84 (s, 1H), 3.77 – 3.61 (m, 8H), 2.16 – 2.12 (m, 1H), 2.01 – 1.95 (m, 1H), 1.84 – 1.73 (m, 5H).  $^{13}C\{^1H\}$  NMR (100 MHz,  $CDCl_3-d$ ):  $\delta$  167.1, 162.0, 137.1, 129.3, 125.2, 120.5, 118.8, 78.9, 66.4, 62.0, 58.9, 51.0, 39.7, 33.8, 24.7, 23.7. HRMS (ESI)  $m/z$ :  $[M + H]^+$  Calcd for  $C_{20}H_{24}N_3O_2S^+$  370.1584; Found 370.1590.

*4-Cyano-3-morpholino-N-phenyl-2-thiaspiro[4.6]undec-3-ene-1-carboxamide* (**5c**).

Dihydrothiophene **4c** (98 mg, 1.0 equiv, 0.22 mmol), sodium (26 mg, 5.0 equiv, 1.11 mmol) and dry ethanol (3.0 mL). Yield of **5c** 90% (80 mg), mp 178–180 °C.  $^1H$  NMR (400 MHz,  $CDCl_3-d$ ):  $\delta$  7.88 (s, 1H), 7.48 (d,  $J = 7.8$  Hz, 2H), 7.34 (t,  $J = 7.8$  Hz, 2H), 7.15 (t,  $J = 7.4$  Hz, 1H), 3.87 (s, 1H), 3.76 – 3.74 (m, 4H), 3.67 – 3.57 (m, 4H), 2.23 – 2.17 (m, 1H), 2.11 – 2.00 (m, 2H), 1.90 – 1.84 (m, 1H), 1.75 – 1.59 (m, 5H), 1.52 – 1.40 (m, 3H).  $^{13}C\{^1H\}$  NMR (100 MHz,  $CDCl_3-d$ ):  $\delta$  166.8, 162.0, 137.1, 129.3, 125.2, 120.4, 119.2, 81.4, 66.4, 59.4, 57.7, 51.1, 39.1, 34.9, 31.1, 30.6, 23.8, 23.7. HRMS (ESI)  $m/z$ :  $[M + H]^+$  Calcd for  $C_{22}H_{28}N_3O_2S^+$  398.1897; Found 398.1908.

*4-Cyano-3-morpholino-N-phenyl-2-thiaspiro[4.7]dodec-3-ene-1-carboxamide* (**5d**).

Dihydrothiophene **4d** (60 mg, 1.0 equiv, 0.13 mmol), sodium (15 mg, 5.0 equiv, 0.66 mmol) and dry ethanol (2.5 mL). Yield of **5d** 67% (36 mg), mp 131–133 °C.  $^1H$  NMR (400 MHz,  $DMSO-d_6$ ):  $\delta$  10.05 (s, 1H), 7.55 (d,  $J = 7.6$  Hz, 2H), 7.32 (t,  $J = 7.9$  Hz, 2H), 7.08 (t,  $J = 7.4$  Hz, 1H), 4.04 (s, 1H), 3.66 – 3.64 (m, 4H), 3.57 – 3.45 (m, 4H), 2.03 – 1.89 (m, 4H), 1.71 – 1.55 (m, 8H), 1.46 – 1.35 (m, 2H).  $^{13}C\{^1H\}$  NMR (100 MHz,  $DMSO-d_6$ ):  $\delta$  166.9, 163.5, 138.4, 128.8, 123.8, 119.7, 119.5, 78.2, 65.6, 56.9, 56.8, 50.6, 33.4, 29.4,

29.1, 27.1, 24.6, 22.7, 22.4. HRMS (ESI)  $m/z$ :  $[M + H]^+$  Calcd for  $C_{23}H_{29}N_3O_2S^+$  412.2053; Found 412.2052.

*4-Cyano-N-phenyl-3-(piperidin-1-yl)-2-thiaspiro[4.7]dodec-3-ene-1-carboxamide* (**5e**). Dihydrothiophene **4e** (70 mg, 1.0 equiv, 0.15 mmol), sodium (17 mg, 5.0 equiv, 0.75 mmol) and dry ethanol (2.5 mL). Yield of **5e** 71% (45 mg), mp 112–115 °C.  $^1H$  NMR (400 MHz, DMSO- $d_6$ ):  $\delta$  10.03 (s, 1H), 7.55 (d,  $J$  = 7.5 Hz, 2H), 7.32 (t,  $J$  = 7.0 Hz, 2H), 7.08 (t,  $J$  = 6.5 Hz, 1H), 4.00 (s, 1H), 3.52 (br s, 4H), 2.01 – 1.93 (m, 4H), 1.57 (br s, 14H), 1.42 – 1.37 (m, 2H).  $^{13}C\{^1H\}$  NMR (100 MHz, DMSO- $d_6$ ):  $\delta$  167.1, 162.9, 138.4, 128.8, 128.3, 123.8, 120.1, 119.5, 95.4, 76.4, 56.9, 56.6, 51.8, 33.6, 29.5, 29.2, 27.1, 25.5, 24.6, 23.4, 22.7, 22.4. HRMS (ESI)  $m/z$ :  $[M + H]^+$  Calcd for  $C_{24}H_{32}N_3OS^+$  410.2261; Found 410.2266.

*3-(Azepan-1-yl)-4-cyano-N-phenyl-2-thiaspiro[4.7]dodec-3-ene-1-carboxamide* (**5f**). Dihydrothiophene **4f** (74 mg, 1.0 equiv, 0.16 mmol), sodium (18 mg, 5.0 equiv, 0.80 mmol) and dry ethanol (2.5 mL). Yield of **5f** 89% (60 mg), mp 127–131 °C.  $^1H$  NMR (400 MHz, DMSO- $d_6$ ):  $\delta$  10.03 (s, 1H), 7.55 (d,  $J$  = 7.6 Hz, 2H), 7.32 (t,  $J$  = 7.9 Hz, 2H), 7.08 (t,  $J$  = 7.4 Hz, 1H), 4.00 (s, 1H), 3.59 – 3.56 (m, 4H), 2.03 – 1.87 (m, 4H), 1.78 – 1.34 (m, 18H).  $^{13}C\{^1H\}$  NMR (100 MHz, DMSO- $d_6$ ):  $\delta$  167.1, 161.7, 138.5, 128.8, 123.8, 120.6, 119.5, 73.5, 57.3, 56.9, 53.3, 33.6, 29.7, 29.3, 28.1, 27.1, 26.0, 24.6, 22.8, 22.5. HRMS (ESI)  $m/z$ :  $[M + H]^+$  Calcd for  $C_{25}H_{34}N_3OS^+$  424.2417; Found 424.2421.

### The procedure for the derivatization of dihydrothiophene **4g**

*N*-(1-(2-Acetyl-4-cyano-5-morpholino-3-phenyl-2,3-dihydrothiophen-2-yl)ethylidene)-4-methylbenzenesulfonamide (**4g**, 160 mg, 1.0 equiv, 0.31 mmol) was subjected to column chromatography on neutral alumina (eluent EtOAc:PE, gradient up to 3:2) to afford 5-acetyl-2-morpholino-4-phenyl-4,5-dihydrothiophene-3-carbonitrile (**5g**) as a yellow powder. Yield of **5g** 66% (65 mg), mp 141–142 °C.  $^1H$  NMR (400 MHz,  $CDCl_3$ - $d$ ):  $\delta$  7.38–7.28 (m, 5H), 4.73 (d,  $J$  = 3.5 Hz, 1H), 4.05 (d,  $J$  = 3.5 Hz, 1H), 3.77–3.73 (m, 4H), 3.68–3.62 (m, 4H), 2.27 (s, 3H).  $^{13}C\{^1H\}$  NMR (100 MHz,  $CDCl_3$ - $d$ ):  $\delta$  201.1, 161.9, 140.6, 129.2, 128.1, 127.2, 118.7, 74.2, 66.3, 60.7, 53.9, 50.9, 27.5. HRMS (ESI)  $m/z$ :  $[M + H]^+$  Calcd for  $C_{17}H_{19}N_2O_2S^+$  315.1162; Found 315.1165.

### Additional mechanistic studies

The control experiment was performed for dihydrothiophene **1a** with the use of the deuterated water (Scheme S1). In the presence of D<sub>2</sub>O O-H (N-H) deuteration product **9a'** was obtained.

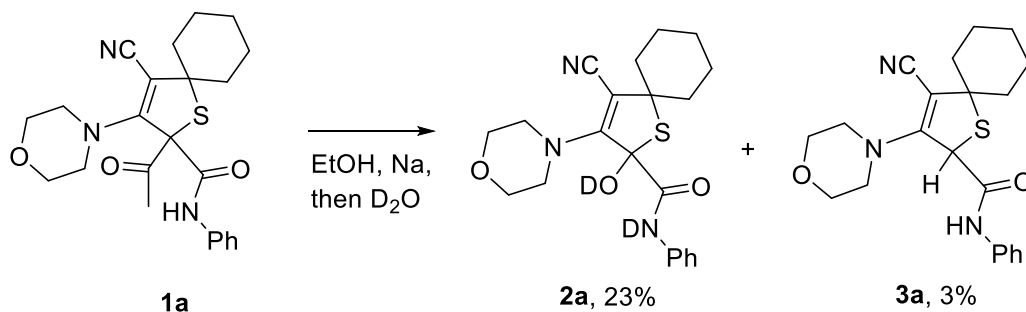

**Scheme S1.** Conditions: dihydrothiophene **1a** (0.12 mmol, 5 equiv), sodium (0.59 mmol, 1 equiv), EtOH (2 mL), rt, 1 h, then D<sub>2</sub>O (2.0 mL). Isolated yield after trituration and centrifugation in Et<sub>2</sub>O.

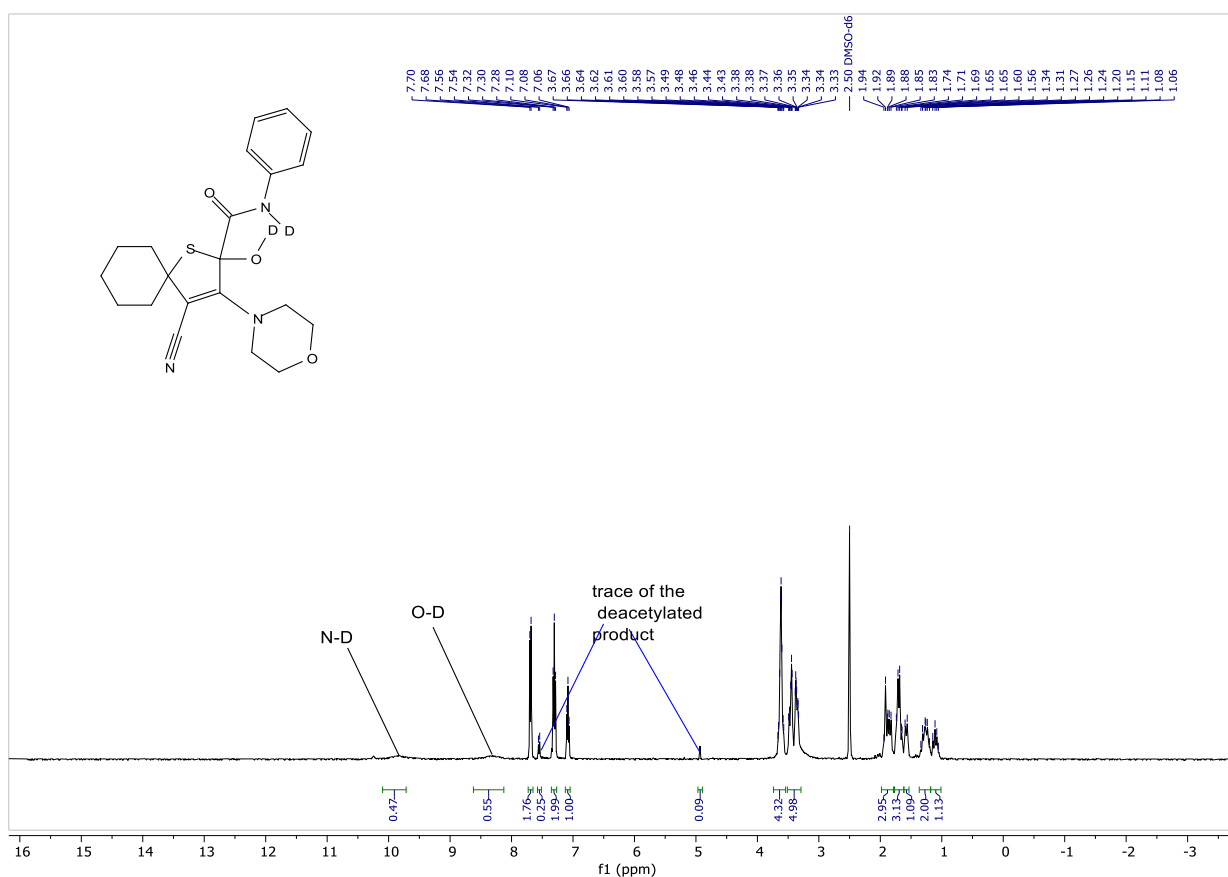

**Figure S1.** <sup>1</sup>H NMR spectrum of the deuterated product.

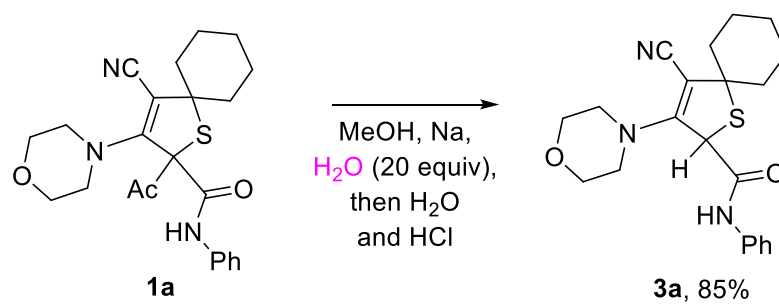

**Scheme S2.** Control experiment. Conditions: dihydrothiophene **1a** (0.12 mmol, 5 equiv), sodium (0.59 mmol, 1 equiv), MeOH (2 mL),  $\text{H}_2\text{O}$  (2.4 mmol, 20 equiv), rt, 1 h, then  $\text{H}_2\text{O}$  (2.0 mL), HCl (0.25 mL). Isolated yield after trituration and centrifugation in  $\text{Et}_2\text{O}$ .

## References

1. Ilkin, V. G.; Filimonov, V. O.; Utepova, I. A.; Beryozkina, T. V.; Slepukhin, P. A.; Tumashov, A. A.; Dehaen, W.; Bakulev, V. A. *Org. Chem. Front.* **2024**, *11*, 3537–3545. doi:10.1039/D3QO02025H
2. Ilkin, V. G.; Filimonov, V. O.; Seliverstova, E. A.; Novikov, M.S.; Beryozkina, T. V.; Gagarin, A. A.; Belskaya, N. P.; Muthipeedika, N. J.; Bakulev, V. A.; Dehaen, W. *J. Org. Chem.* **2022**, *87*, 12196–12213. doi:10.1021/acs.joc.2c01352
3. Wang, Z.; Bi, X.; Liao, P.; Zhang, R.; Lianga, Y.; Dong, D. *Chem. Comm.* **2012**, *48*, 7076–7078. doi:10.1039/C2CC33157H
